# Supplementary material for: Value of imaging to guide interventional procedures in rheumatic and musculoskeletal diseases: a systematic literature review informing EULAR points to consider
Source: HighWire-hosted journal article supplement (doi:10.1136/rmdopen-2021-001864), 2021-11-01
Supplement: rmdopen-2021-001864supp002_data_supplement.pdf [file rmdopen-2021-001864supp002_data_supplement.pdf]

## Supplementary table 2

### Search terms for the for the literature search in Medline, Embase, the Cochrane Library and Epistemonikos

#### MEDLINE

1. exp Arthritis/
2. rheumatolog\$.tw.
3. ((rheumatoid or reumatoid or revmatoid or rheumatic or reumatic or revmatic or rheumat\$ or reumat\$ or revmarthrit\$ or juvenile) adj3 (arthrit\$ or artrit\$ or diseas\$ or condition\$ or nodule\$)).tw.
4. (juvenile\$ adj3 arthrit\$).tw.
5. jia.tw.
6. (sjogren\$ adj2 syndrome).tw.
7. (sicca adj2 syndrome).tw.
8. still\$ disease.tw.
9. bechterew\$ disease.tw.
10. exp osteoarthritis/
11. osteoarthr\$.tw.
12. (degenerative adj2 arthritis).tw.
13. exp Spondylitis/
14. (ankylos\$ or spondyl\$).tw.
15. exp Lupus Erythematosus, Systemic/
16. (lupus adj (erythematosus or Nephritis or Vasculitis)).tw.
17. sle.tw.
18. Fibromyalgia/
19. fibromyalgi\$.tw.
20. fibrositis.tw.
21. Gout/
22. gout\$.tw.
23. Polymyalgia Rheumatica/
24. polymyalgia rheumatica.tw.
25. peri-extra-articular rheumatism.tw.
26. rhizomelic pseudopolyarthriti\$.tw.
27. exp Nerve Compression Syndromes/
28. (nerve adj (compression or entrapment)).tw.
29. ((carpal or tarsal or cubital) adj tunnel).tw.
30. ((Cauda Equina or Piriformis Muscle Thoracic Outlet or Cervical Rib) adj syndrome).tw.
31. Pudendal Neuralgia.tw.
32. or/1-31
33. exp diagnostic imaging/
34. di.fs.

35. exp radiography/
36. magnetic resonance.tw.
37. mri\$.tw.
38. (ultrasonic adj (diagnos\$ or tomograph\$ or imag\$)).tw.
39. (computed tomograph\$ or CT).tw.
40. echograph\$.tw.
41. ultrasonography\$.tw.
42. ultrasound.tw.
43. sonograph\$.tw.
44. (xray\$ or x-ray\$).tw.
45. (roentgen adj ray\$).tw.
46. fluoroscop\$.tw.
47. fusion imaging.tw.
48. or/33-47
49. exp Joints/
50. exp Tendons/
51. exp Muscles/
52. Enthesopathy/
53. exp Spine/
54. exp peripheral nerves/
55. Anatomic Landmarks/
56. (joint\$ or muscle\$ or muscular or tendon\$ or Enthes\$ or spine or spinal or bursae or soft tissue or synovial or nerve\$).tw.
57. or/49-56
58. (guide\$ or guidance or placement or position\$).tw.
59. and/32,48,57-58
60. randomized controlled trial.pt.
61. controlled clinical trial.pt.
62. randomized.ab.
63. placebo.ab.
64. drug therapy.fs.
65. randomly.ab.
66. trial.ab.
67. groups.ab.
68. exp cohort studies/
69. observational study.pt.
70. (cohort\$ or prospective\$ or retrospective or observational or longitudinal or follow-up).tw.
71. (safe or safety).tw.
72. ((adverse or undesirable or harms\$ or serious or toxic) adj3 (effect\$ or reaction\$ or event\$ or outcome\$)).tw.
73. exp product surveillance, postmarketing/
74. exp Postoperative Complications/

- 75. exp Intraoperative Complications/
- 76. or/60-76
- 77. exp animals/ not humans.sh.
- 78. 76 not 77
- 79. 59 and 78

## EMBASE

- #77. #56 AND #75 AND ([article]/lim OR [article in press]/lim OR [review]/lim) AND [humans]/lim
- #76. #56 AND #75
- #75. #57 OR #58 OR #59 OR #60 OR #61 OR #62 OR #63 OR #64 OR #65 OR #66 OR #67 OR #68 OR #69 OR #70 OR #71 OR #72 OR #73 OR #74
- #74. 'peroperative complication'/de
- #73. 'postoperative complication'/exp
- #72. 'postmarketing surveillance'/exp
- #71. ((adverse OR undesirable OR harms\* OR serious OR toxic) NEAR/3 (effect\* OR reaction\* OR event\* OR outcome\*)):ab,ti
- #70. safe:ab,ti OR safety:ab,ti
- #69. cohort\*:ab,ti OR prospective\*:ab,ti OR retrospective:ab,ti OR observational:ab,ti OR longitudinal:ab,ti OR 'follow up':ab,ti
- #68. 'observational study'/de
- #67. 'cohort analysis'/de
- #66. 'crossover procedure'/de
- #65. 'double blind procedure'/de
- #64. 'single-blind procedure'
- #63. crossover\*:ab,ti OR 'cross over\*':ab,ti
- #62. placebo\*:ab,ti
- #61. (doubl\* NEAR/2 blind\*):ab,ti
- #60. allocat\*:ab,ti
- #59. trial:ti
- #58. 'randomized controlled trial'/exp
- #57. random\*:ab,ti
- #56. #33 AND #48 AND #54 AND #55
- #55. guide\*:ab,ti OR guidance:ab,ti OR placement:ab,ti OR position\*:ab,ti
- #54. #49 OR #50 OR #51 OR #52 OR #53
- #53. joint\*:ab,ti OR muscle\*:ab,ti OR muscular:ab,ti OR tendon\*:ab,ti OR enthes\*:ab,ti OR spine:ab,ti OR spinal:ab,ti OR bursae:ab,ti OR 'soft tissue':ab,ti OR synovial:ab,ti OR nerve\*:ab,ti
- #52. 'anatomic landmark'/de
- #51. 'peripheral nerve'/exp
- #50. 'enthesopathy'/exp
- #49. 'musculoskeletal system'/exp
- #48. #34 OR #35 OR #36 OR #37 OR #38 OR #39 OR #40 OR #41 OR #42 OR #43 OR #44 OR #45 OR #46 OR #47
- #47. 'fusion imaging':ab,ti
- #46. fluoroscop\*:ab,ti
- #45. 'roentgen ray\*':ab,ti
- #44. 'x ray\*':ab,ti OR xray\*:ab,ti
- #43. sonograph\*:ab,ti
- #42. ultrasound:ab,ti
- #41. ultrasonography\*:ab,ti
- #40. echograph\*:ab,ti
- #39. 'computed tomograph\*':ab,ti OR ct:ab,ti

- #38. (ultrasonic NEAR/2 (diagnos\* OR tomograph\* OR imag\*)):ab,ti  
 #37. mri\*:ab,ti  
 #36. 'magnetic resonance':ab,ti  
 #35. 'radiography'/exp  
 #34. 'diagnostic imaging'/exp  
 #33. #1 OR #2 OR #3 OR #4 OR #5 OR #6 OR #7 OR #8 OR #9 OR #10 OR #11 OR #12 OR #13 OR #14 OR #15 OR #16 OR #17 OR #18 OR #19 OR #20 OR #21 OR #22 OR #23 OR #24 OR #25 OR #26 OR #27 OR #28 OR #29 OR #30 OR #31 OR #32  
 #32. 'pudendal neuralgia':ab,ti  
 #31. (('cauda equina' OR 'piriformis muscle thoracic outlet' OR 'cervical rib') NEAR/2 syndrome):ab,ti  
 #30. ((carpal OR tarsal OR cubital) NEAR/2 tunnel):ab,ti  
 #29. (nerve NEAR/2 (compression OR entrapment)):ab,ti  
 #28. 'nerve compression'/de  
 #27. 'periarticular joint disease'/exp  
 #26. 'rhizomelic pseudopolyarthriti\*':ab,ti  
 #25. 'peri-extra-articular rheumatism':ab,ti  
 #24. 'rheumatic polymyalgia':ab,ti  
 #23. 'rheumatic polymyalgia'/de  
 #22. gout\*:ab,ti  
 #21. 'gout'/de  
 #20. fibrositis:ab,ti  
 #19. fibromyalgia\*:ab,ti  
 #18. 'fibromyalgia'/de  
 #17. sle:ab,ti  
 #16. (lupus NEAR/2 (erythematosus OR nephritis OR vasculitis)):ab,ti  
 #15. 'lupus erythematosus'/exp  
 #14. ankylos\*:ab,ti OR spondyl\*:ab,ti  
 #13. (degenerative NEAR/2 arthritis):ab,ti  
 #12. osteoarthr\*:ab,ti  
 #11. 'bechterew\* disease':ab,ti  
 #10. 'still\* disease':ab,ti  
 #9. (sicca NEAR/2 syndrome):ab,ti  
 #8. (sjogren\* NEAR/2 syndrome):ab,ti  
 #7. jia:ab,ti  
 #6. (juvenile\* NEAR/3 arthrit\*):ab,ti  
 #5. rheumatology\*:ab,ti  
 #4. (caplan\* NEAR/2 syndrome):ab,ti  
 #3. (felty\* NEAR/2 syndrome):ab,ti  
 #2. ((rheumatoid OR reumatoid OR rheumat\* OR reumat\*) NEAR/3 (arthrit\* OR artrit\* OR diseas\* OR condition\* OR nodule\*)):ab,ti  
 #1. 'arthritis'/exp

### The Cochrane Library

- #1 MeSH descriptor: [Arthritis] explode all trees  
 #2 ((rheumatoid OR reumatoid OR rheumat\* OR reumat\*) NEAR/3 (arthrit\* OR artrit\* OR diseas\* OR condition\* OR nodule\*)):ab,ti  
 #3 (felty\* NEAR/2 syndrome):ab,ti  
 #4 (caplan\* NEAR/2 syndrome):ab,ti  
 #5 rheumatology\*:ab,ti  
 #6 (juvenile\* NEAR/3 arthrit\*):ab,ti  
 #7 jia:ab,ti  
 #8 (sjogren\* NEAR/2 syndrome):ab,ti

- #9 (sicca NEAR/2 syndrome):ab,ti  
 #10 "still\* disease":ab,ti  
 #11 "bechterew\* disease":ab,ti  
 #12 osteoarthr\*:ab,ti  
 #13 (degenerative NEAR/2 arthritis):ab,ti  
 #14 ankylos\*:ab,ti OR spondyl\*:ab,ti  
 #15 MeSH descriptor: [Lupus Erythematosus, Systemic] explode all trees  
 #16 (lupus NEAR/2 (erythematosus OR nephritis OR vasculitis)):ab,ti  
 #17 sle:ab,ti  
 #18 MeSH descriptor: [Fibromyalgia] explode all trees  
 #19 fibromyalgia\*:ab,ti  
 #20 fibrositis:ab,ti  
 #21 MeSH descriptor: [Gout] explode all trees  
 #22 gout\*:ab,ti  
 #23 MeSH descriptor: [Polymyalgia Rheumatica] explode all trees  
 #24 "rheumatic polymyalgia":ab,ti  
 #25 'peri-extra-articular rheumatism':ab,ti  
 #26 "rhizomelic pseudopolyarthriti\*":ab,ti  
 #27 MeSH descriptor: [Nerve Compression Syndromes] explode all trees  
 #28 (nerve NEAR/2 (compression OR entrapment)):ab,ti  
 #29 ((carpal OR tarsal OR cubital) NEAR/2 tunnel):ab,ti  
 #30 (('cauda equina' OR 'piriformis muscle thoracic outlet' OR 'cervical rib') NEAR/2 syndrome):ab,ti  
 #31 "pudental neuralgia":ab,ti  
 #32 #1 OR #2 OR #3 OR #4 OR #5 OR #6 OR #7 OR #8 OR #9 OR #10 OR #11 OR #12 OR #13 OR #14 OR #15 OR #16 OR #17 OR #18 OR #19 OR #20 OR #21 OR #22 OR #23 OR #24 OR #25 OR #26 OR #27 OR #28 OR #29 OR #30 OR #31  
 #33 MeSH descriptor: [Diagnostic Imaging] explode all trees  
 #34 MeSH descriptor: [] explode all trees and with qualifier(s): [diagnostic imaging - DG]  
 #35 MeSH descriptor: [Radiography] explode all trees  
 #36 "magnetic resonance":ab,ti  
 #37 mri\*:ab,ti  
 #38 (ultrasonic NEAR/2 (diagnos\* OR tomograph\* OR imag\*)):ab,ti  
 #39 "computed tomograph\*":ab,ti OR ct:ab,ti  
 #40 echograph\*:ab,ti  
 #41 ultrasonography\*:ab,ti  
 #42 ultrasound:ab,ti  
 #43 sonograph\*:ab,ti  
 #44 "x ray\*":ab,ti OR xray\*:ab,ti  
 #45 "'roentgen ray\*":ab,ti  
 #46 fluoroscop\*:ab,ti  
 #47 "fusion imaging":ab,ti  
 #48 #33 OR #34 OR #35 OR #36 OR #37 OR #38 OR #39 OR #40 OR #41 OR #42 OR #43 OR #44 OR #45 OR #46 OR #47  
 #49 MeSH descriptor: [Joints] explode all trees  
 #50 MeSH descriptor: [Tendons] explode all trees  
 #51 MeSH descriptor: [Muscles] explode all trees  
 #52 MeSH descriptor: [Enthesopathy] this term only  
 #53 MeSH descriptor: [Spine] explode all trees  
 #54 MeSH descriptor: [Peripheral Nerves] explode all trees  
 #55 MeSH descriptor: [Anatomic Landmarks] this term only  
 #56 (joint\* OR muscle\* OR muscular OR tendon\* OR Enthes\* OR spine OR spinal OR bursae OR "soft tissue" OR synovial OR nerve\*):ab,ti  
 #57 #49 OR #50 OR #51 OR #52 OR #53 OR #54 OR #55 OR #56  
 #58 (guide\* OR guidance OR placement OR position\*):ab,ti  
 #59 #32 AND #48 AND #57 AND #58

**Epistemonikos**

#1 Imag\* OR radiograph\* OR "magnetic resonance" OR mri OR ultraso\* OR tomograph\* OR ct OR echograph\* OR sonograph\* OR "x ray\*" OR xray\* OR roentgen OR fluoroscop\*

#2 guide\* OR guidance OR placement OR position\*

#3 #1 AND #2 Publication type: Systematic Review; Cochrane Review: No; Systematic Review Question: Interventions; Type of meta-analysis: All
