# Supplementary material for: Value of imaging to guide interventional procedures in rheumatic and musculoskeletal diseases: a systematic literature review informing EULAR points to consider
Source: HighWire-hosted journal article supplement (doi:10.1136/rmdopen-2021-001864), 2021-11-01
Supplement: rmdopen-2021-001864supp004_data_supplement.pdf [file rmdopen-2021-001864supp004_data_supplement.pdf]

## Supplementary table 3

### Details of the risk of bias assessment

#### Risk of bias assessment of cross-sectional studies

The Appraisal Tool for Cross-Sectional Studies (AXIS tool) comprises 20 items in 5 domains, evaluating various aspects of methodological quality (Downes MJ, Brennan ML, Williams HC, Dean RS. Development of a critical appraisal tool to assess the quality of cross-sectional studies (AXIS). *BMJ Open* 2016;6:e011458). Each item has three rating options: “Yes” - met the description of a particular evaluation criterion, “No” - did not meet a particular criterion or “Don't know” - insufficient information to evaluate a particular criterion.

#### Risk of bias questions (AXIS)

##### Introduction

1. Were the aims/objectives of the study clear?

##### Methods

2. Was the study design appropriate for the stated aim(s)?
3. Was the sample size justified?
4. Was the target/reference population clearly defined? (Is it clear who the research was about?)
5. Was the sample frame taken from an appropriate population base so that it closely represented the target/reference population under investigation?
6. Was the selection process likely to select subjects/participants that were representative of the target/reference population under investigation?
7. Were measures undertaken to address and categorise non-responders?
8. Were the risk factor and outcome variables measured appropriate to the aims of the study?
9. Were the risk factor and outcome variables measured correctly using instruments/measurements that had been trialled, piloted or published previously?
10. Is it clear what was used to determine statistical significance and/or precision estimates? (e.g. p-values, confidence intervals)
11. Were the methods (including statistical methods) sufficiently described to enable them to be repeated?

##### Results

12. Were the basic data adequately described?

13. Does the response rate raise concerns about non-response bias?
14. If appropriate, was information about non-responders described?
15. Were the results internally consistent?
16. Were the results presented for all the analyses described in the methods?

#### Discussion

17. Were the authors' discussions and conclusions justified by the results?
18. Were the limitations of the study discussed?

#### Other

19. Were there any funding sources or conflicts of interest that may affect the authors' interpretation of the results?
20. Was ethical approval or consent of participants attained?

**Table.** Risk of bias assessment of cross-sectional studies (AXIS tool)

| Author, year         | Introduction    | Methods        |                 |   |                 |                 |                  |                |                  |   |    | Results         |                  |                  |    | Discussion |                 | Other          |                 |                 |
|----------------------|-----------------|----------------|-----------------|---|-----------------|-----------------|------------------|----------------|------------------|---|----|-----------------|------------------|------------------|----|------------|-----------------|----------------|-----------------|-----------------|
|                      |                 | 1              | 2               | 3 | 4               | 5               | 6                | 7              | 8                | 9 | 10 | 11              | 12               | 13*              | 14 | 15         | 16              | 17             | 18              | 19*             |
| Balint et al., 2002  | Y               | Y              | N <sup>1</sup>  | Y | DK <sup>2</sup> | DK <sup>2</sup> | Y                | Y              | Y                | Y | Y  | Y               | N                | N/A <sup>3</sup> | Y  | Y          | Y               | N <sup>4</sup> | NI <sup>5</sup> | NI <sup>6</sup> |
| Chang et al., 2015   | N <sup>7</sup>  | N <sup>7</sup> | N <sup>8</sup>  | Y | DK <sup>2</sup> | DK <sup>2</sup> | N/A <sup>3</sup> | N <sup>7</sup> | DK <sup>9</sup>  | Y | Y  | N <sup>10</sup> | N/A <sup>3</sup> | N/A <sup>3</sup> | Y  | Y          | N <sup>11</sup> | Y              | NI <sup>5</sup> | Y               |
| Bossert et al., 2016 | Y               | Y              | N <sup>12</sup> | Y | DK <sup>2</sup> | DK <sup>2</sup> | Y                | Y              | DK <sup>13</sup> | Y | Y  | Y               | N                | N/A <sup>3</sup> | Y  | Y          | Y               | Y              | NI <sup>5</sup> | Y               |
| Resnick et al., 2017 | N <sup>14</sup> | Y              | N <sup>1</sup>  | Y | N <sup>15</sup> | N <sup>15</sup> | Y                | Y              | Y                | Y | Y  | Y               | N                | N <sup>16</sup>  | Y  | Y          | Y               | Y              | NI <sup>5</sup> | Y               |

Y=yes; N=no; DK= don't know; NI= no information; N/A=not applicable;\*Item is reverse scored (i.e., no is a positive) <sup>1</sup>no information on sample size; <sup>2</sup>no information why exactly these patients were chosen; <sup>3</sup>not applicable for this study design; <sup>4</sup>limitations of the study are not discussed; <sup>5</sup>no information on funding; <sup>6</sup>no information on ethical approval or consent of participants; <sup>7</sup>aims/objectives/methods of the study are not clear; <sup>8</sup>no information why Authors has chosen the period 2002-2011; <sup>9</sup>scarce information on the reference and index test; <sup>10</sup>baseline data for each group are missing; <sup>11</sup>discussions and conclusions seem not be justified by the results; <sup>12</sup>no information about the reason of the patients number; <sup>13</sup>questionable whether "how strong was your severe impairment" is actually a validated tool; <sup>14</sup>not clear imaging procedures used in the image-guided group; <sup>15</sup>several subtypes of JIA; <sup>16</sup>information about non-responders are not described.

### **Risk of bias assessment of non-randomised studies**

The Risk Of Bias In Non-randomised Studies - of Interventions tool (ROBINS-I tool) comprises 34 items in 7 domains, evaluating various aspects of methodological quality (Sterne JAC et al, ROBINS-I: a tool for assessing risk of bias in non-randomised studies of interventions. *BMJ* 2016;355:i4919). Each domain has five rating options: “Low risk of bias” - the study is comparable to a well performed randomised trial; “Moderate risk of bias” - the study provides sound evidence for a non-randomised study but cannot be considered comparable to a well performed randomised trial; “Serious risk of bias” - the study has some important problems; “Critical risk of bias” - the study is too problematic to provide any useful evidence and should not be included in any synthesis; “No information” - No information on which to base a judgement about risk of bias.

### **Risk of bias questions (ROBINS-I)**

#### Bias due to confounding

1.1 Is there potential for confounding of the effect of intervention in this study?

If N/PN to 1.1: the study can be considered to be at low risk of bias due to confounding and no further signalling questions need be considered.

If Y/PY to 1.1: determine whether there is a need to assess time-varying confounding: 1.2. Was the analysis based on splitting participants' follow up time according to intervention received?

If N/PN, answer questions relating to baseline confounding (1.4 to 1.6)

If Y/PY, proceed to question 1.3.

1.3. Were intervention discontinuations or switches likely to be related to factors that are prognostic for the outcome?

If N/PN, answer questions relating to baseline confounding (1.4 to 1.6)

If Y/PY, answer questions relating to both baseline and time-varying confounding (1.7 and 1.8)

1.4. Did the authors use an appropriate analysis method that controlled for all the important confounding domains?

1.5. If Y/PY to 1.4: Were confounding domains that were controlled for measured validly and reliably by the variables available in this study?

1.6. Did the authors control for any post-intervention variables that could have been affected by the intervention?

1.7. Did the authors use an appropriate analysis method that adjusted for all the important confounding domains and for time-varying confounding?

1.8. If Y/PY to 1.7: Were confounding domains that were adjusted for measured validly and reliably by the variables available in this study?

Optional: What is the predicted direction of bias due to confounding?

#### Bias in selection of participants into the study

2.1. Was selection of participants into the study (or into the analysis) based on participant characteristics observed after the start of intervention? If N/PN to 2.1: go to 2.4

2.2. If Y/PY to 2.1: Were the postintervention variables that influenced selection likely to be associated with intervention?

2.3 If Y/PY to 2.2: Were the postintervention variables that influenced selection likely to be influenced by the outcome or a cause of the outcome?

2.4. Do start of follow-up and start of intervention coincide for most participants?

2.5. If Y/PY to 2.2 and 2.3, or N/PN to 2.4: Were adjustment techniques used that are likely to correct for the presence of selection biases?

Optional: What is the predicted direction of bias due to selection of participants into the study?

#### Bias in classification of interventions

3.1 Were intervention groups clearly defined?

3.2 Was the information used to define intervention groups recorded at the start of the intervention?

3.3 Could classification of intervention status have been affected by knowledge of the outcome or risk of the outcome?

Optional: What is the predicted direction of bias due to measurement of outcomes or interventions?

#### Bias due to deviations from intended interventions

4.1. Were there deviations from the intended intervention beyond what would be expected in usual practice?

4.2. If Y/PY to 4.1: Were these deviations from intended intervention unbalanced between groups and likely to have affected the outcome?

4.3. Were important co-interventions balanced across intervention groups?

4.4. Was the intervention implemented successfully for most participants?

4.5. Did study participants adhere to the assigned intervention regimen?

4.6. If N/PN to 4.3, 4.4 or 4.5: Was an appropriate analysis used to estimate the effect of starting and adhering to the intervention?

Optional: What is the predicted direction of bias due to deviations from the intended interventions?

#### Bias due to missing data

5.1 Were outcome data available for all, or nearly all, participants?

5.2 Were participants excluded due to missing data on intervention status?

5.3 Were participants excluded due to missing data on other variables needed for the analysis?

5.4 If PN/N to 5.1, or Y/PY to 5.2 or 5.3: Are the proportion of participants and reasons for missing data similar across interventions?

5.5 If PN/N to 5.1, or Y/PY to 5.2 or 5.3: Is there evidence that results were robust to the presence of missing data?

Optional: What is the predicted direction of bias due to missing data?

#### Bias in measurement of outcomes

6.1 Could the outcome measure have been influenced by knowledge of the intervention received?

6.2 Were outcome assessors aware of the intervention received by study participants?

6.3 Were the methods of outcome assessment comparable across intervention groups?

6.4 Were any systematic errors in measurement of the outcome related to intervention received?

Optional: What is the predicted direction of bias due to measurement of outcomes?

#### Bias in selection of the reported results

Is the reported effect estimate likely to be selected, on the basis of the results, from...

7.1 ... multiple outcome measurements within the outcome domain?

7.2 ... multiple analyses of the interventionoutcome relationship?

7.3 ... different subgroups?

Optional: What is the predicted direction of bias due to selection of the reported result?

**Table.** Risk of bias assessment of non-randomised studies of the effects of interventions (ROBINS-I tool).

| Author, year                       | Bias due to confounding | Bias in selection of participants into the study | Bias in classification of interventions | Bias due to deviations from intended interventions | Bias due to missing data | Bias in measurement of outcomes | Bias in selection of the reported results | Overall Bias |
|------------------------------------|-------------------------|--------------------------------------------------|-----------------------------------------|----------------------------------------------------|--------------------------|---------------------------------|-------------------------------------------|--------------|
| Hartung et al., 2010               | NI <sup>1</sup>         | Serious <sup>2</sup>                             | Moderate <sup>3</sup>                   | Low                                                | Low                      | Low                             | Low                                       | Serious      |
| Park et al., 2015                  | Moderate <sup>4</sup>   | Low                                              | Serious <sup>5</sup>                    | Low                                                | Low                      | Serious <sup>6</sup>            | Serious <sup>7</sup>                      | Serious      |
| Althoff et al., 2015               | Low                     | Low                                              | Moderate <sup>8</sup>                   | Low                                                | Low                      | Serious <sup>9</sup>            | Moderate <sup>10</sup>                    | Serious      |
| Petscavage-Thomas and Gustas, 2016 | Low                     | Low                                              | Moderate <sup>8</sup>                   | Low                                                | Low                      | Serious <sup>9</sup>            | Moderate <sup>10</sup>                    | Serious      |
| Just et al., 2018                  | Moderate <sup>11</sup>  | Moderate <sup>12</sup>                           | Moderate <sup>13</sup>                  | Low                                                | Low                      | NI <sup>14</sup>                | Moderate <sup>15</sup>                    | Moderate     |
| Omar et al., 2018                  | Serious <sup>16</sup>   | Moderate <sup>12</sup>                           | Serious <sup>17</sup>                   | Low                                                | Low                      | NI <sup>18</sup>                | Low                                       | Serious      |
| Hsu et al., 2018                   | Serious <sup>16</sup>   | Serious <sup>19</sup>                            | Moderate <sup>20</sup>                  | Serious <sup>21</sup>                              | Serious <sup>22</sup>    | Low                             | Low                                       | Serious      |
| Humby et al., 2018                 | Critical <sup>23</sup>  | Low                                              | Low                                     | Low                                                | NI <sup>24</sup>         | Low                             | Moderate <sup>10</sup>                    | Critical     |
| Lundstrom et al., 2019             | Serious <sup>25</sup>   | Low                                              | Serious <sup>26</sup>                   | Moderate <sup>27</sup>                             | Low                      | Moderate <sup>28</sup>          | Low                                       | Serious      |
| Gershkovich et al., 2019           | Serious <sup>16</sup>   | Low                                              | Moderate <sup>29</sup>                  | Low                                                | Low                      | Serious <sup>30</sup>           | Serious <sup>31</sup>                     | Serious      |
| Diffre et al., 2020                | Serious <sup>16</sup>   | Low                                              | Moderate <sup>29</sup>                  | Moderate <sup>27</sup>                             | Low                      | Serious <sup>30</sup>           | Moderate <sup>7</sup>                     | Serious      |

|                    |                       |                        |                        |                        |                  |                       |                       |         |
|--------------------|-----------------------|------------------------|------------------------|------------------------|------------------|-----------------------|-----------------------|---------|
| McKee et al., 2020 | Serious <sup>16</sup> | Low                    | Moderate <sup>29</sup> | Moderate <sup>27</sup> | Low              | Serious <sup>30</sup> | Moderate <sup>7</sup> | Serious |
| Henne et al., 2020 | Serious <sup>16</sup> | Moderate <sup>12</sup> | Moderate <sup>29</sup> | Moderate <sup>27</sup> | NI <sup>24</sup> | Serious <sup>30</sup> | Serious <sup>31</sup> | Serious |

NI= no information; <sup>1</sup>no information on confounding; <sup>2</sup>selection into the study is related to intervention and outcome and intervention group is classified after outcome assessment; <sup>3</sup>some aspects of the assignment of intervention status are determined retrospectively; <sup>4</sup>no clear confounding found, no methods for protecting for confounding; <sup>5</sup>the stratification is at high risk for bias (patients chose procedure after information on costs and pros and cons); <sup>6</sup>few information on the process of outcome measurement, no blinding is done, retrospective study; <sup>7</sup>conclusions are drawn from a small part of the results; <sup>8</sup>intervention groups are only partially clearly defined; <sup>9</sup>minimal information available on outcomes measurement; <sup>10</sup>results derive from one domain of the outcomes; <sup>11</sup>reliability and validity of measurement of important domains are sufficient, so we do not expect serious residual confounding; <sup>12</sup>no information on patients selection; <sup>13</sup>intervention status is partially affected by knowledge of the outcome; <sup>14</sup>no information on outcome assessment, retrospective study; <sup>15</sup>no selection of reported outcomes; <sup>16</sup>at least one important domain is not appropriately measured, or not controlled for confounding; <sup>17</sup>the lack of adequate reasoning why a patient is classified in the respective group leads to the possible bias; <sup>18</sup>no information on outcome assessment; <sup>19</sup>selection into the study is related to intervention and outcome; <sup>20</sup>some aspects of the assignment of intervention status are determined retrospectively; <sup>21</sup>some patients do not adhere to the assigned intervention regimen, and an appropriate analysis used to estimate the effect of starting and adhering to the intervention is not performed; <sup>22</sup>no evidence that results are robust due to the presence of missing data; <sup>23</sup>several domains are not protected for confounding (e.g. different study centres, different people performing the intervention, different diseases); <sup>24</sup>no information on missing data; <sup>25</sup>at least one important domain is not appropriately measured, or not controlled for confounding (e.g. confounding risk for exact injection point); <sup>26</sup>the lack of adequate reasoning why a patient is classified in the respective group leads to the possible bias; <sup>27</sup>no information on co-interventions; <sup>28</sup>the methods of outcome assessment are probably similar between groups, the knowledge of the intervention can change the outcome, retrospective study; <sup>29</sup>no information if the data used to define intervention groups are recorded at the start of the intervention; <sup>30</sup>no or only minimal information available on outcomes measurement; <sup>31</sup>the reported effect estimates likely to be selected.

## **Risk of bias assessment of randomised clinical trials**

The risk-of-bias tool for randomized trials (RoB 2) is structured into five domains through which bias might be introduced into the result (Sterne JAC, et al. RoB 2: a revised tool for assessing risk of bias in randomised trials. *BMJ* 2019;366:l4898). The response options for the signalling questions are: “Yes”; “Probably yes”; “Probably no”; “No”; “No information”. To maximize the signalling questions’ simplicity and clarity, they are phrased so that a response of “Yes” may be indicative of either a low or high risk of bias, depending on the most natural way to ask the question. The tool includes algorithms that map responses to signalling questions onto a proposed risk-of-bias judgement for each domain, and then reaching an overall risk-of-bias judgement for a specific outcome. The possible risk-of-bias judgements are: “Low risk of bias” - the study is judged to have a low risk of bias for all domains for this result.; “Some concerns” - the study is judged to raise some concerns in at least one domain for this result, but not to have a high risk of bias for any domain.; “High risk of bias” - the study is judged to have a high risk of bias in at least one domain for this result, Or the study is judged to have some concerns for multiple domains in a way that substantially lowers confidence in the result.

### **Risk of bias questions (RoB 2)**

#### Bias arising from the randomization process

- 1.1 Was the allocation sequence random?
  - 1.2 Was the allocation sequence concealed until participants were enrolled and assigned to interventions?
  - 1.3 Did baseline differences between intervention groups suggest a problem with the randomisation process?
- Optional: What is the predicted direction of bias arising from the randomization process?

#### Bias due to deviations from intended interventions

- 2.1 Were participants aware of their assigned intervention during the trial?
- 2.2 Were carers and people delivering the interventions aware of participants’ assigned intervention during the trial?
- 2.3. If Y/PY/NI to 2.1 or 2.2: Were important co-interventions balanced across intervention groups?
- 2.4. Was the intervention implemented successfully?
- 2.5. Did study participants adhere to the assigned intervention regimen?
- 2.6. If N/PN/NI to 2.3, 2.4 or 2.5: Was an appropriate analysis used to estimate the effect of starting and adhering to the intervention?

Optional: What is the predicted direction of bias due to deviations from intended interventions?

#### Bias due to missing outcome data

3.1 Were data for this outcome available for all, or nearly all, participants randomised?

3.2 If N/PN/NI to 3.1: Is there evidence that the result was not biased by missing outcome data?

3.3 If N/PN to 3.2: Could missingness in the outcome depend on its true value?

3.4 If Y/PY/NI to 3.3: Is it likely that missingness in the outcome depended on its true value?

Optional: What is the predicted direction of bias due to missing outcome data?

#### Bias in measurement of the outcome

4.1 Was the method of measuring the outcome inappropriate?

4.2 Could measurement or ascertainment of the outcome have differed between intervention groups?

4.3 If N/PN/NI to 4.1 and 4.2: Were outcome assessors aware of the intervention received by study participants?

4.4 If Y/PY/NI to 4.3: Could assessment of the outcome have been influenced by knowledge of intervention received?

4.5 If Y/PY/NI to 4.4: Is it likely that assessment of the outcome was influenced by knowledge of intervention received?

Optional: What is the predicted direction of bias in measurement of the outcome?

#### Bias in selection of the reported result

5.1 Were the data that produced this result analysed in accordance with a prespecified analysis plan that was finalised before unblinded outcome data were available for analysis?

Is the numerical result being assessed likely to have been selected, on the basis of the results, from:

5.2 ... multiple eligible outcome measurements (eg, scales, definitions, time points) within the outcome domain?

5.3 ... multiple eligible analyses of the data? N/PN Y/PY NI

Optional: What is the predicted direction bias due to selection of the reported results?

**Table.** Risk of bias assessment of randomised clinical trials (RoB 2).

| Author, year                                                                                                                                                              | Randomisation process       | Deviations from intended interventions | Missing outcome data       | Measurement of the outcome  | Selection of the reported result | Overall Bias           |
|---------------------------------------------------------------------------------------------------------------------------------------------------------------------------|-----------------------------|----------------------------------------|----------------------------|-----------------------------|----------------------------------|------------------------|
| Naredo et al., 2004                                                                                                                                                       | Some concerns <sup>1</sup>  | Low                                    | Low                        | Low/High <sup>2</sup>       | Low                              | Some concerns/<br>High |
| Luz et al., 2008                                                                                                                                                          | Some concerns <sup>3</sup>  | Low                                    | Low                        | Some concerns <sup>4</sup>  | Low                              | Some concerns          |
| Sibbitt et al., 2009                                                                                                                                                      | Some concerns <sup>1</sup>  | Low                                    | Low                        | Some concerns <sup>5</sup>  | Low                              | Some concerns          |
| Im et al., 2009                                                                                                                                                           | Some concerns <sup>6</sup>  | Low                                    | Low                        | Some concerns <sup>7</sup>  | Low                              | Some concerns          |
| Lee et al., 2009                                                                                                                                                          | Some concerns <sup>1</sup>  | Low                                    | Low                        | Low                         | Low                              | Some concerns          |
| Cunnington et al., 2010                                                                                                                                                   | Some concerns <sup>1</sup>  | Low                                    | Low                        | Low                         | Low                              | Some concerns          |
| Hashiuchi et al., 2011                                                                                                                                                    | Some concerns <sup>1</sup>  | Low                                    | Low                        | Low                         | Low                              | Some concerns          |
| Zhang et al., 2011                                                                                                                                                        | High <sup>8</sup>           | Low                                    | Some concerns <sup>9</sup> | Some concerns <sup>10</sup> | Some concerns <sup>11</sup>      | High                   |
| Park et al., 2011                                                                                                                                                         | Some concerns <sup>1</sup>  | Low                                    | Low                        | Low                         | Low                              | Some concerns          |
| Sibbitt Jr et al., A randomized controlled trial evaluating the cost-effectiveness of sonographic guidance for intra-articular injection of the osteoarthritic knee, 2011 | Some concerns <sup>1</sup>  | Low                                    | Low                        | Some concerns <sup>5</sup>  | Low                              | Some concerns          |
| Sibbitt Jr et al., A randomized controlled trial of the cost-effectiveness of ultrasound-guided intraarticular injection of inflammatory arthritis, 2011                  | Some concerns <sup>1</sup>  | Low                                    | Low                        | Some concerns <sup>5</sup>  | Low                              | Some concerns          |
| Sibbitt et al., 2012                                                                                                                                                      | Some concerns <sup>12</sup> | Low                                    | Low                        | Some concerns <sup>5</sup>  | Low                              | Some concerns          |
| Bum Park et al., 2012                                                                                                                                                     | Some concerns <sup>1</sup>  | Low                                    | Low                        | Low                         | Low                              | Some concerns          |
| Jang et al., 2013                                                                                                                                                         | Some concerns <sup>1</sup>  | Low                                    | Low                        | Some concerns <sup>5</sup>  | Low                              | Some concerns          |
| Sabeti-Aschraf et al., 2013                                                                                                                                               | Low                         | Low                                    | Low                        | Low                         | Some concerns <sup>13</sup>      | Low                    |

|                             |                             |                    |                             |                                  |                             |                    |
|-----------------------------|-----------------------------|--------------------|-----------------------------|----------------------------------|-----------------------------|--------------------|
| Makhlouf et al., 2014       | Low                         | Low                | Low                         | High <sup>14</sup>               | Some concerns <sup>15</sup> | High               |
| Park et al., 2013           | Some concerns <sup>1</sup>  | Low                | Low                         | Low                              | Low                         | Some concerns      |
| Ustun et al., 2013          | Some concerns <sup>1</sup>  | Low                | Low                         | Low                              | Some concerns <sup>16</sup> | Some concerns      |
| Kim et al., 2013            | Some concerns <sup>1</sup>  | Low                | Low                         | Low                              | Low                         | Some concerns      |
| Chang et al., 2014          | Some concerns <sup>1</sup>  | Low                | Low                         | Low                              | Low                         | Some concerns      |
| Fowler et al., 2014         | High <sup>12</sup>          | Low                | Low                         | Some concerns <sup>5</sup>       | Low                         | High               |
| Saeed et al., 2014          | Low                         | Low                | High <sup>17</sup>          | Low                              | Low                         | High               |
| Jee et al., 2014            | Some concerns <sup>1</sup>  | Low                | Low                         | Some concerns/High <sup>18</sup> | Low                         | High               |
| Cecen et al., 2015          | High <sup>20</sup>          | Low                | Low                         | Low                              | Low                         | High               |
| Soneji et al., 2016         | Some concerns <sup>1</sup>  | Low                | Low                         | Some concerns <sup>5</sup>       | Low                         | Some concerns      |
| Shinomiya et al., 2016      | Some concerns <sup>21</sup> | Low                | Low/High <sup>22</sup>      | Some concerns <sup>23</sup>      | Low                         | Some concerns/High |
| Cho et al., 2016            | Low                         | Low                | Low                         | Low                              | Low                         | Low                |
| Raeissadat et al., 2017     | High <sup>24</sup>          | Low                | Low                         | Some concerns <sup>25</sup>      | Low                         | High               |
| Eslamian et al., 2017       | Some concerns <sup>1</sup>  | Low                | Low                         | Low                              | Low                         | Some concerns      |
| Orlandi et al., 2017        | Some concerns <sup>1</sup>  | Low                | Some concerns <sup>26</sup> | Some concerns <sup>27</sup>      | Low                         | Some concerns      |
| Mardani-Kivi et al., 2018   | Some concerns <sup>1</sup>  | Low                | Low                         | Low                              | Low                         | Some concerns      |
| Mitchell et al., 2018       | Some concerns <sup>1</sup>  | Low                | Low                         | High <sup>14</sup>               | Some concerns <sup>15</sup> | High               |
| Nordberg et al., 2018       | Some concerns <sup>28</sup> | Low                | Low                         | Low                              | Some concerns <sup>29</sup> | Some concerns      |
| Lee et al., 2018            | Some concerns <sup>1</sup>  | Low                | Low                         | Some concerns <sup>5</sup>       | Low                         | Some concerns      |
| Babaei-Ghazani et al., 2018 | Some concerns <sup>1</sup>  | Low                | Low                         | Some concerns <sup>5</sup>       | Low                         | Some concerns      |
| Khallaf et al., 2018        | High <sup>30</sup>          | High <sup>31</sup> | Low                         | Low                              | Low                         | High               |
| Chen et al., 2018           | Some concerns <sup>32</sup> | Low                | Low                         | Some concerns <sup>5</sup>       | Low                         | Some concerns      |
| Pan et al., 2019            | Some concerns <sup>33</sup> | Low                | High <sup>34</sup>          | High <sup>35</sup>               | High <sup>36</sup>          | High               |
| Kim et al., 2019            | Some concerns <sup>1</sup>  | Low                | Low                         | Some concerns <sup>5</sup>       | Low                         | Some concerns      |
| Hak Roh et al., 2019        | Some concerns <sup>1</sup>  | Low                | Low                         | Some concerns <sup>5</sup>       | Low                         | Some concerns      |

|                             |                             |     |                    |                             |     |               |
|-----------------------------|-----------------------------|-----|--------------------|-----------------------------|-----|---------------|
| Vahdatpour et al., 2019     | High <sup>24</sup>          | Low | Low                | Low                         | Low | High          |
| Roh et al., 2019            | Some concerns <sup>1</sup>  | Low | High <sup>37</sup> | Some concerns <sup>38</sup> | Low | High          |
| Lee et al., 2019            | Some concerns <sup>39</sup> | Low | Low                | Low                         | Low | Some concerns |
| Rayegani et al., 2019       | Some concerns <sup>39</sup> | Low | Low                | Low                         | Low | Some concerns |
| Cohen et al., 2019          | Low                         | Low | Low                | Low                         | Low | Low           |
| Sheth et al., 2020          | Some concerns <sup>39</sup> | Low | Low                | High <sup>27</sup>          | Low | High          |
| Yiannakopoulos et al., 2020 | Some concerns <sup>1</sup>  | Low | Low                | High <sup>40</sup>          | Low | High          |
| Babaei-Ghazani et al., 2020 | Some concerns <sup>41</sup> | Low | Low                | Low                         | Low | Some concerns |
| Cankurtaran et al., 2020    | High <sup>42</sup>          | Low | Low                | Low                         | Low | High          |

<sup>1</sup>no information when allocation is concealed; <sup>2</sup>not well described if the ultrasound also performed the procedure (high risk of bias only for accuracy outcome); <sup>3</sup>few information on randomization process; <sup>4</sup>no description on what is measured exactly as outcomes; <sup>5</sup>scarce information on outcomes measurement; <sup>6</sup>no information on the randomization process; <sup>7</sup>no information who assessed x-ray imaging, no information on blinding; <sup>8</sup>no information on the randomization process and when allocation is concealed, unequal number of participants between groups; <sup>9</sup>no information on patients lost to follow up; <sup>10</sup>not clear who decided whether or not another injection was needed and whether this person was blinded to the group assignment; <sup>11</sup>multiple time points measured but only two time points reported (the first and the last visit) and it is unclear whether these time points are not measured; <sup>12</sup>demographic data are not described; <sup>13</sup>unclear in some reported results; <sup>14</sup>no blinding of outcome assessor; no information on outcomes measurement; <sup>15</sup>some variables are only measured at 2 week time-point; <sup>16</sup>no adjustment for repeated measurements (but only 3 time-points: baseline-6 weeks-12 weeks); <sup>17</sup>considerable number of patients excluded due to repeated injections/surgery; <sup>18</sup>using ultrasound and fluoroscopy to guide an injection and then assessing the success of the procedure using fluoroscopy has a risk of leading to a measurement bias (accuracy outcome), missing information on adverse events and patient satisfaction outcome measures, Pain and Function outcomes had low risk of bias; <sup>19</sup>the randomisation leads to a significant larger amount of females in the US group compared to the blind group, no info when allocation is concealed; <sup>20</sup>no information on the randomization process and when allocation is concealed; <sup>21</sup>reason for patients lost to follow up and not integrated in the analysis is unclear (only for recurrence of symptoms outcome), for the other outcomes low risk of bias; <sup>22</sup>a hand surgeon not blinded to the treatment assignment performed all US studies; <sup>23</sup>unbalanced baseline data; <sup>24</sup>no information whether outcome assessor is blinded; <sup>25</sup>from 107 treated patients in one needle group, 7 are lost at baseline, 4 are lost at 3 months and 6 are lost at 1 year (in total 16%), 102 per group was needed according to sample size calculations, 10% of patients were lost at 1 year in the 2 needle group; <sup>26</sup>outcomes assessment is performed by the same person performing the intervention; <sup>27</sup>more female than male in one group compared to the other; <sup>28</sup>the study is most probably not designed for some type of analysis, being a secondary analysis; <sup>29</sup>differences at the baseline, before the injection, for the item "internal rotation"; <sup>30</sup>no information about intended interventions; no information about time-points; <sup>31</sup>randomization is done by coin toss, leading to baseline imbalances which are not well described, no statistical testing for baseline differences; <sup>32</sup>no information on the randomization process, no info on age/gender; <sup>33</sup>>10% lost to follow up; no information on sample size calculation; <sup>34</sup>no information who assessed the outcomes; it is not clear whether this missing of blindness could have affected the outcome; <sup>35</sup>p value for grading is calculated using a t test; however, no information at which time-point it is significant and no adaption for repeated measures; <sup>36</sup>high dropouts, more than estimated in the sample size calculation; <sup>37</sup>unclear who measures outcomes; <sup>38</sup>few information on randomization process; no information when allocation is concealed; <sup>39</sup>no information on who assesses outcomes, probably it is the same one who performs the intervention; <sup>40</sup>no information on some baseline data (e.g. sex, comorbidities), no information on instruments for procedures; <sup>41</sup>no information on demographic data and comorbidities.

## References

- ALTHOFF, C. E., BOLLOW, M., FEIST, E., MARTICORENA-GARCIA, S. R., ESHED, I., DIEKHOFF, T., HAMM, B. & HERMANN, K. G. 2015. CT-guided corticosteroid injection of the sacroiliac joints: quality assurance and standardized prospective evaluation of long-term effectiveness over six months. *Clin Rheumatol*, 34, 1079-84.
- BABAEI-GHAZANI, A., FOROGH, B., RAISSI, G. R., AHADI, T., EFTEKHARSADAT, B., YOUSEFI, N., RAHIMI-DEHGOLAN, S. & MORADI, K. 2020. Ultrasound-Guided Corticosteroid Injection in Carpal Tunnel Syndrome: Comparison Between Radial and Ulnar Approaches. *Journal of pain research*, 13, 1569-1578.
- BABAEI-GHAZANI, A., NIKBAKHT, N., FOROGH, B., RAISSI, G. R., AHADI, T., EBADI, S., ROOMIZADEH, P., FADAVI, H. R., RAEISSADAT, S. A. & EFTEKHARSADAT, B. 2018. Comparison Between Effectiveness of Ultrasound-Guided Corticosteroid Injection Above Versus Below the Median Nerve in Mild to Moderate Carpal Tunnel Syndrome: A Randomized Controlled Trial. *American Journal of Physical Medicine & Rehabilitation*, 97, 407-413.
- BALINT, P. V., KANE, D., HUNTER, J., MCINNES, I. B., FIELD, M. & STURROCK, R. D. 2002. Ultrasound guided versus conventional joint and soft tissue fluid aspiration in rheumatology practice: a pilot study. *J Rheumatol*, 29, 2209-13.
- BOSSERT, M., BOUBLIL, D., PARISAUX, J.-M., BOZGAN, A.-M., RICHELME, E. & CONROZIER, T. 2016. Imaging Guidance Improves the Results of Viscosupplementation with HANOX-M-XL in Patients with Ankle Osteoarthritis: Results of a Clinical Survey in 50 Patients Treated in Daily Practice. *Clinical medicine insights. Arthritis and musculoskeletal disorders*, 9, 195-199.
- BUM PARK, Y., AH CHOI, W., KIM, Y. K., CHUL LEE, S. & HAE LEE, J. 2012. Accuracy of blind versus ultrasound-guided suprapatellar bursal injection. *J Clin Ultrasound*, 40, 20-5.
- CANKURTARAN, D., KARAAHMET, O. Z., YILDIZ, S. Y., EKSIUGLU, E., DULGEROGLU, D. & UNLU, E. 2020. Comparing the effectiveness of ultrasound guided versus blind genicular nerve block on pain, muscle strength with isokinetic device, physical function and quality of life in chronic knee osteoarthritis: a prospective randomized controlled study. *The Korean journal of pain*, 33, 258-266.
- CECEN, G. S., GULABI, D., SAGLAM, F., TANJU, N. U. & BEKLER, H. I. 2015. Corticosteroid injection for trigger finger: Blinded or ultrasound-guided injection? *Archives of Orthopaedic and Trauma Surgery*, 135, 125-131.
- CHANG, C. Y., SIMEONE, F. J., NELSON, S. B., TANEJA, A. K. & HUANG, A. J. 2015. Is Biopsying the Paravertebral Soft Tissue as Effective as Biopsying the Disk or Vertebral Endplate? 10-Year Retrospective Review of CT-Guided Biopsy of Diskitis-Osteomyelitis. *AJR Am J Roentgenol*, 205, 123-9.
- CHANG, W. H., KIM, Y. W., CHOI, S. & LEE, S. C. 2014. Comparison of the therapeutic effects of intramuscular subscapularis and scapulothoracic bursa injections in patients with scapular pain: A randomized controlled trial. *Rheumatology International*, 34, 1203-1209.
- CHEN, P. C., WANG, L. Y., PONG, Y. P., HSIN, Y. J., LIAW, M. Y. & CHIANG, C. W. 2018. Effectiveness of ultrasound-guided vs direct approach corticosteroid injections for carpal tunnel syndrome: A double-blind randomized controlled trial. *J Rehabil Med*, 50, 200-208.
- CHO, C. H., KIM DU, H., BAE, K. C., LEE, D. & KIM, K. 2016. Proper site of corticosteroid injection for the treatment of idiopathic frozen shoulder: Results from a randomized trial. *Joint Bone Spine*, 83, 324-9.

- COHEN, S. P., BICKET, M. C., KURIHARA, C., GRIFFITH, S. R., FOWLER, I. M., JACOBS, M. B., LIU, R., ANDERSON WHITE, M., VERDUN, A. J., HARI, S. B., FISHER, R. L., PASQUINA, P. F. & VOROBAYCHIK, Y. 2019. Fluoroscopically Guided vs Landmark-Guided Sacroiliac Joint Injections: A Randomized Controlled Study. *Mayo Clinic Proceedings*, 94, 628-642.
- CUNNINGTON, J., MARSHALL, N., HIDE, G., BRACEWELL, C., ISAACS, J., PLATT, P. & KANE, D. 2010. A randomized, double-blind, controlled study of ultrasound-guided corticosteroid injection into the joint of patients with inflammatory arthritis. *Arthritis Rheum*, 62, 1862-9.
- DIFFRE, C., JOUSSET, C., ROUX, A. L., DURAN, C., NOUSSAIR, L., ROTTMAN, M., CARLIER, R. Y. & DINH, A. 2020. Predictive factors for positive disco-vertebral biopsy culture in pyogenic vertebral osteomyelitis, and impact of fluoroscopic versus scanographic guidance. *BMC Infectious Diseases*, 20.
- ESLAMIAN, F., EFTEKHARSADAT, B., BABAEI-GHAZANI, A., JAHANJOO, F. & ZEINALI, M. 2017. A Randomized Prospective Comparison of Ultrasound-Guided and Landmark-Guided Steroid Injections for Carpal Tunnel Syndrome. *Journal of Clinical Neurophysiology*, 34, 107-113.
- FOWLER, I. M., TUCKER, A. A., WEIMERSKIRCH, B. P., MORAN, T. J. & MENDEZ, R. J. 2014. A randomized comparison of the efficacy of 2 techniques for piriformis muscle injection: ultrasound-guided versus nerve stimulator with fluoroscopic guidance. *Regional Anesthesia & Pain Medicine*, 39, 126-32.
- GERSHKOVICH, G. E., BOYADJIAN, H. & CONTI MICA, M. 2019. The Effect of Image-Guided Corticosteroid Injections on Thumb Carpometacarpal Arthritis. *Hand (New York, N.Y.)*, 1558944719846572.
- HAK ROH, Y., KIM, S., SIK GONG, H. & HYUN BAEK, G. 2019. A randomized comparison of ultrasound-guided versus landmark-based corticosteroid injection for trigger finger. *The Journal of hand surgery, European volume*, 1753193419839892.
- HARTUNG, W., ROSS, C. J., STRAUB, R., FEUERBACH, S., SCHOLMERICH, J., FLECK, M. & HEROLD, T. 2010. Ultrasound-guided sacroiliac joint injection in patients with established sacroiliitis: precise IA injection verified by MRI scanning does not predict clinical outcome. *Rheumatology (Oxford)*, 49, 1479-82.
- HASHIUCHI, T., SAKURAI, G., MORIMOTO, M., KOMEI, T., TAKAKURA, Y. & TANAKA, Y. 2011. Accuracy of the biceps tendon sheath injection: Ultrasound-guided or unguided injection? A randomized controlled trial. *Journal of Shoulder and Elbow Surgery*, 20, 1069-1073.
- HENNE, M., CENTURION, A., ZEINI, I. M., YOUMANS, D. H. & OSBAHR, D. C. 2020. Trends in Utilization of Image Guidance for Hip Joint Injections. *Clinical journal of sport medicine : official journal of the Canadian Academy of Sport Medicine*.
- HSU, Y. C., YANG, F. C., HSU, H. H. & HUANG, G. S. 2018. Ultrasound-Guided Corticosteroid Injection in Patients with Carpal Tunnel Syndrome: Efficacy of Intra-Epineurial Injection. *Ultraschall Med*, 39, 334-342.
- HUMBY, F., ROMAO, V. C., MANZO, A., FILER, A., BUGATTI, S., VIEIRA-SOUSA, E., KELLY, S., WECHALEKAR, M., AHMED, M., ROCHER, V., HANDS, R., MONTECUCCO, C., FONSECA, J. & PITZALIS, C. 2018. A Multicenter Retrospective Analysis Evaluating Performance of Synovial Biopsy Techniques in Patients With Inflammatory Arthritis: Arthroscopic Versus Ultrasound-Guided Versus Blind Needle Biopsy. *Arthritis Rheumatol*, 70, 702-710.
- IM, S. H., LEE, S. C., PARK, Y. B., CHO, S.-R. & KIM, J. C. 2009. Feasibility of Sonography for Intra-articular Injections in the Knee Through a Medial Patellar Portal. *Journal of Ultrasound in Medicine*, 28, 1465-1470.
- JANG, S. H., LEE, S. C., LEE, J. H., NAM, S. H., CHO, K. R. & PARK, Y. 2013. Comparison of ultrasound (US)-guided intra-articular injections by in-plain and out-of-plain on medial portal of the knee. *Rheumatol Int*, 33, 1951-9.

- JEE, H., LEE, J. H., PARK, K. D., AHN, J. & PARK, Y. 2014. Ultrasound-guided versus fluoroscopy-guided sacroiliac joint intra-articular injections in the noninflammatory sacroiliac joint dysfunction: a prospective, randomized, single-blinded study. *Arch Phys Med Rehabil*, 95, 330-7.
- JUST, S. A., HUMBY, F., LINDEGAARD, H., MERIC DE BELLEFON, L., DUREZ, P., VIEIRA-SOUSA, E., TEIXEIRA, R., STOENIU, M., WERLINRUD, J., ROSMARK, S., LARSEN, P. V., PRATT, A., CHOY, E., GENDI, N., BUCH, M. H., EDWARDS, C. J., TAYLOR, P. C., MCINNES, I. B., FONSECA, J. E., PITZALIS, C. & FILER, A. 2018. Patient-reported outcomes and safety in patients undergoing synovial biopsy: comparison of ultrasound-guided needle biopsy, ultrasound-guided portal and forceps and arthroscopic-guided synovial biopsy techniques in five centres across Europe. *RMD Open*, 4, e000799.
- KHALLAF, S. F., HUSSEIN, M. I., EL-BARBARY, A. M. & EL KHOULY, R. M. 2018. Efficacy of ultrasonography-guided intra-articular steroid injection of the shoulder and exercising in patients with adhesive capsulitis: Glenohumeral versus subacromial approaches. *Egyptian Rheumatologist*, 40, 277-280.
- KIM, D. H., LEE, M. S., LEE, S., YOON, S. H., SHIN, J. W. & CHOI, S. S. 2019. A Prospective Randomized Comparison of the Efficacy of Ultrasound- vs Fluoroscopy-Guided Genicular Nerve Block for Chronic Knee Osteoarthritis. *Pain Physician*, 22, 139-146.
- KIM, T. K., LEE, J. H., PARK, K. D., LEE, S. C., AHN, J. & PARK, Y. 2013. Ultrasound versus palpation guidance for intra-articular injections in patients with degenerative osteoarthritis of the elbow. *J Clin Ultrasound*, 41, 479-85.
- LEE, H. J., LIM, K. B., KIM, D. Y. & LEE, K. T. 2009. Randomized controlled trial for efficacy of intra-articular injection for adhesive capsulitis: ultrasonography-guided versus blind technique. *Arch Phys Med Rehabil*, 90, 1997-2002.
- LEE, J. H., LEE, J. U. & YOO, S. W. 2019. Accuracy and efficacy of ultrasound-guided pes anserinus bursa injection. *Journal of clinical ultrasound : JCU*, 47, 77-82.
- LEE, S. H., CHOI, Y. C. & KANG, H. J. 2018. Comparative study of ultrasonography-guided percutaneous A1 pulley release versus blinded percutaneous A1 pulley release. *Journal of Orthopaedic Surgery*, 26.
- LUNDSTROM, Z. T., SYTSMA, T. T. & GREENLUND, L. S. 2019. Rethinking Viscosupplementation: Ultrasound- Versus Landmark-Guided Injection for Knee Osteoarthritis. *Journal of Ultrasound in Medicine*, n/a.
- LUZ, K. R., FURTADO, R. N., NUNES, C. C., ROSENFELD, A., FERNANDES, A. R. & NATOUR, J. 2008. Ultrasound-guided intra-articular injections in the wrist in patients with rheumatoid arthritis: a double-blind, randomised controlled study. *Ann Rheum Dis*, 67, 1198-200.
- MAKHLOUF, T., EMIL, N. S., SIBBITT, W. L., JR., FIELDS, R. A. & BANKHURST, A. D. 2014. Outcomes and cost-effectiveness of carpal tunnel injections using sonographic needle guidance. *Clin Rheumatol*, 33, 849-58.
- MARDANI-KIVI, M., KARIMI-MOBARAKEH, M., BABAEI JANDAGHI, A., KEYHANI, S., SAHEB-EKHTIARI, K. & HASHEMI-MOTLAGH, K. 2018. Intra-sheath versus extra-sheath ultrasound guided corticosteroid injection for trigger finger: a triple blinded randomized clinical trial. *Phys Sportsmed*, 46, 93-97.
- MCKEE, T. C., BELAIR, J. A., SOBOL, K., BROWN, S. A., ABRAHAM, J. & MORRISON, W. 2020. Efficacy of image-guided synovial biopsy. *Skeletal Radiology*, 49, 921-928.
- MITCHELL, W. G., KETTWICH, S. C., SIBBITT, W. L., JR., SIBBITT, R. R., MURUGANANDAM, M., ROLLE, N. A., HAYWARD, W. A., FIELDS, R. A., ROLDAN, L. P., EMIL, N. S., FANGTHAM, M. & BANKHURST, A. D. 2018. Outcomes and cost-effectiveness of ultrasound-guided injection of the trochanteric bursa. *Rheumatol Int*, 38, 393-401.

- NAREDO, E., CABERO, F., BENEYTO, P., CRUZ, A., MONDEJAR, B., USON, J., PALOP, M. J. & CRESPO, M. 2004. A randomized comparative study of short term response to blind injection versus sonographic-guided injection of local corticosteroids in patients with painful shoulder. *Journal of Rheumatology*, 31, 308-14.
- NORDBERG, L. B., LILLEGRAVEN, S., AGA, A. B., SEXTON, J., LIE, E., HAMMER, H. B., OLSEN, I. C., UHLIG, T., VAN DER HEIJDE, D., KVIEN, T. K. & HAAVARDSHOLM, E. A. 2018. The Impact of Ultrasound on the Use and Efficacy of Intraarticular Glucocorticoid Injections in Early Rheumatoid Arthritis: Secondary Analyses From a Randomized Trial Examining the Benefit of Ultrasound in a Clinical Tight Control Regimen. *Arthritis Rheumatol*, 70, 1192-1199.
- OMAR, G., ALI, F., RAGAE, A. & DARWIESH, A. 2018. Ultrasound-guided injection of carpal tunnel syndrome: A comparative study to blind injection. *The Egyptian Rheumatologist*, 40, 131-135.
- ORLANDI, D., MAURI, G., LACELLI, F., CORAZZA, A., MESSINA, C., SILVESTRI, E., SERAFINI, G. & SCOFIENZA, L. M. 2017. Rotator Cuff Calcific Tendinopathy: Randomized Comparison of US-guided Percutaneous Treatments by Using One or Two Needles. *Radiology*, 285, 518-527.
- PAN, M., SHENG, S., FAN, Z., LU, H., YANG, H., YAN, F. & E, Z. 2019. Ultrasound-Guided Percutaneous Release of A1 Pulley by Using a Needle Knife: A Prospective Study of 41 Cases. *Frontiers in pharmacology*, 10, 267-267.
- PARK, K. D., AHN, J. K., LEE, S. C., LEE, J., KIM, J. & PARK, Y. 2013. Comparison of ultrasound-guided intra-articular injections by long axis in plane approach on three different sites of the knee. *American Journal of Physical Medicine & Rehabilitation*, 92, 990-8.
- PARK, K. D., KIM, T. K., LEE, J., LEE, W. Y., AHN, J. K. & PARK, Y. 2015. Palpation Versus Ultrasound-Guided Acromioclavicular Joint Intra-articular Corticosteroid Injections: A Retrospective Comparative Clinical Study. *Pain Physician*, 18, 333-41.
- PARK, Y., LEE, S. C., NAM, H. S., LEE, J. & NAM, S. H. 2011. Comparison of sonographically guided intra-articular injections at 3 different sites of the knee. *Journal of Ultrasound in Medicine*, 30, 1669-76.
- PETSCAVAGE-THOMAS, J. & GUSTAS, C. 2016. Comparison of Ultrasound-Guided to Fluoroscopy-Guided Biceps Tendon Sheath Therapeutic Injection. *Journal of ultrasound in medicine : official journal of the American Institute of Ultrasound in Medicine*, 35, 2217-2221.
- RAEISSADAT, S. A., RAYEGANI, S. M., LANGROUDI, T. F. & KHOINIHA, M. 2017. Comparing the accuracy and efficacy of ultrasound-guided versus blind injections of steroid in the glenohumeral joint in patients with shoulder adhesive capsulitis. *Clinical Rheumatology*, 36, 933-940.
- RAYEGANI, S. M., RAEISSADAT, S. A., AHMADI-DASTGERDI, M., BAVAGHAR, N. & RAHIMI-DEHGOLAN, S. 2019. Comparing The Efficacy Of Local Triamcinolone Injection In Carpal Tunnel Syndrome Using Three Different Approaches with or without Ultrasound Guidance. *Journal of pain research*, 12, 2951-2958.
- RESNICK, C. M., VAKILIAN, P. M., KABAN, L. B. & PEACOCK, Z. S. 2017. Is Intra-Articular Steroid Injection to the Temporomandibular Joint for Juvenile Idiopathic Arthritis More Effective and Efficient When Performed With Image Guidance? *J Oral Maxillofac Surg*, 75, 694-700.
- ROH, Y. H., HWANGBO, K., GONG, H. S. & BAEK, G. H. 2019. Comparison of Ultrasound-Guided Versus Landmark-Based Corticosteroid Injection for Carpal Tunnel Syndrome: A Prospective Randomized Trial. *Journal of Hand Surgery - American Volume*, 44, 304-310.
- SABETI-ASCHRAF, M., STOTTER, C., THALER, C., KRISTEN, K., SCHMIDT, M., KRIFTER, R. M., HEXEL, M., OSTERMANN, R., HOFSTAEDTER, T., GRAF, A. & WINDHAGER, R. 2013. Intra-articular versus periarticular acromioclavicular joint injection: a multicenter, prospective, randomized, controlled trial. *Arthroscopy*, 29, 1903-10.

- SAEED, A., KHAN, M., MORRISSEY, S., KANE, D. & FRASER, A. D. 2014. Impact of outpatient clinic ultrasound imaging in the diagnosis and treatment for shoulder impingement: a randomized prospective study. *Rheumatology International*, 34, 503-9.
- SHETH, T., MIRANDA, O. M. & JOHNSON, B. 2020. Assessment of patient satisfaction, functionality, and quality of life after ultrasound-guided knee intervention: a prospective study. *Clinical Rheumatology*.
- SHINOMIYA, R., SUNAGAWA, T., NAKASHIMA, Y., YOSHIZUKA, M. & ADACHI, N. 2016. Impact of Corticosteroid Injection Site on the Treatment Success Rate of Trigger Finger: A Prospective Study Comparing Ultrasound-Guided True Intra-Sheath and True Extra-Sheath Injections. *Ultrasound Med Biol*, 42, 2203-8.
- SIBBITT JR, W. L., BAND, P. A., CHAVEZ-CHIANG, N. R., DELEA, S. L., NORTON, H. E. & BANKHURST, A. D. 2011. A randomized controlled trial of the cost-effectiveness of ultrasound-guided intraarticular injection of inflammatory arthritis. *Journal of Rheumatology*, 38, 252-63.
- SIBBITT JR, W. L., BAND, P. A., KETTWICH, L. G., CHAVEZ-CHIANG, N. R., DELEA, S. L. & BANKHURST, A. D. 2011. A randomized controlled trial evaluating the cost-effectiveness of sonographic guidance for intra-articular injection of the osteoarthritic knee. *Journal of Clinical Rheumatology*, 17, 409-415.
- SIBBITT, W. L., JR., KETTWICH, L. G., BAND, P. A., CHAVEZ-CHIANG, N. R., DELEA, S. L., HASELER, L. J. & BANKHURST, A. D. 2012. Does ultrasound guidance improve the outcomes of arthrocentesis and corticosteroid injection of the knee? *Scandinavian Journal of Rheumatology*, 41, 66-72.
- SIBBITT, W. L., JR., PEISAJOVICH, A., MICHAEL, A. A., PARK, K. S., SIBBITT, R. R., BAND, P. A. & BANKHURST, A. D. 2009. Does sonographic needle guidance affect the clinical outcome of intraarticular injections? *J Rheumatol*, 36, 1892-902.
- SONEJI, N., BHATIA, A., SEIB, R., TUMBER, P., DISSANAYAKE, M. & PENG, P. W. H. 2016. Comparison of Fluoroscopy and Ultrasound Guidance for Sacroiliac Joint Injection in Patients with Chronic Low Back Pain. *Pain Practice*, 16, 537-544.
- USTUN, N., TOK, F., YAGZ, A. E., KIZIL, N., KORKMAZ, I., KARAZINCIR, S., OKUYUCU, E. & TURHANOGU, A. D. 2013. Ultrasound-guided vs. blind steroid injections in carpal tunnel syndrome: A single-blind randomized prospective study. *Am J Phys Med Rehabil*, 92, 999-1004.
- VAHDATPOUR, B., HAGHIGHAT, S., AZIMI, Z. & RAMEZANIAN, H. 2019. Carpal tunnel syndrome treatment using ultrasound-guided versus landmark-guided corticosteroid injection: A randomized prospective trial. *Shiraz E Medical Journal*, 20.
- YIANNAKOPOULOS, C. K., MEGALOIKONOMOS, P. D., FOUFA, K. & GLIATIS, J. 2020. Ultrasound-guided versus palpation-guided corticosteroid injections for tendinosis of the long head of the biceps: A randomized comparative study. *Skeletal Radiology*, 49, 585-591.
- ZHANG, J., EBRAHEIM, N. & LAUSE, G. E. 2011. Ultrasound-guided injection for the biceps brachii tendinitis: results and experience. *Ultrasound Med Biol*, 37, 729-33.
