# Supplementary material for: Value of imaging to guide interventional procedures in rheumatic and musculoskeletal diseases: a systematic literature review informing EULAR points to consider
Source: HighWire-hosted journal article supplement (doi:10.1136/rmdopen-2021-001864), 2021-11-01
Supplement: rmdopen-2021-001864supp005_data_supplement.pdf [file rmdopen-2021-001864supp005_data_supplement.pdf]

Supplementary table 4. Outcome details for studies comparing different imaging techniques or imaging vs. palpation guidance in large joints and periarticular structures (PICO1)

| AUTHOR, DATE                      | DISEASE              | SITE                                               | OUTCOME CATEGORY | OUTCOME DETAIL | OUTCOME EXPLANATION (UNIT) <sup>1</sup>                                       | TIME POINT                  | RESULTS <sup>2</sup>              | OVERALL ROB <sup>3</sup> |
|-----------------------------------|----------------------|----------------------------------------------------|------------------|----------------|-------------------------------------------------------------------------------|-----------------------------|-----------------------------------|--------------------------|
| ULTRASOUND vs. PALPATION GUIDANCE |                      |                                                    |                  |                |                                                                               |                             |                                   |                          |
| Raeissadat et al., 2017           | adhesive capsulitis  | shoulder joint                                     | Accuracy         | Accuracy       | Intra-target verified by contrast medium in joint according to X-ray exam (%) | Post-procedure              | no difference                     | high                     |
|                                   |                      |                                                    | Safety           | Pain           | Patient Pain VAS (cm)                                                         | BSL, 1w, 4w                 | no difference                     | high                     |
|                                   |                      |                                                    | Safety           | Adverse events | Complications <sup>4</sup> (%)                                                | 4w                          | no difference                     | high                     |
|                                   |                      |                                                    | Efficacy         | Function       | Improvement from BSL in abduction ROM (°)                                     | BSL, 1w, 4w                 | no difference                     | high                     |
|                                   |                      |                                                    | Efficacy         | Function       | Improvement from BSL in flexion ROM (°)                                       | BSL, 1w, 4w                 | no difference                     | high                     |
|                                   |                      |                                                    | Efficacy         | Function       | Improvement from BSL in extension ROM (°)                                     | BSL, 1w, 4w                 | no difference <sup>5</sup>        | high                     |
|                                   |                      |                                                    | Efficacy         | Function       | Improvement from BSL in internal rotation ROM (°)                             | BSL, 1w, 4w                 | no difference                     | high                     |
|                                   |                      |                                                    | Efficacy         | Function       | Improvement from BSL in external rotation ROM (°)                             | BSL, 1w, 4w                 | 1,4w: better for US               | high                     |
|                                   |                      |                                                    | Efficacy         | Function       | Oxford score                                                                  | BSL, 1w, 4w                 | no difference                     | high                     |
| Lee et al., 2009                  | adhesive capsulitis  | shoulder joint                                     | Safety           | Pain           | Daytime patient pain VAS (cm)                                                 | BSL, 1w, 2w, 3w, 4w, 5w, 6w | 1,2w: better for US               | some concern             |
|                                   |                      |                                                    | Safety           | Pain           | Before sleep patient pain VAS (cm)                                            | BSL, 1w, 2w, 3w, 4w, 5w, 6w | 1,2w: better for US               | some concern             |
|                                   |                      |                                                    | Efficacy         | Function       | Flexion ROM (°)                                                               | BSL, 1w, 2w, 3w, 4w, 5w, 6w | 1,2,3w: better for US             | some concern             |
|                                   |                      |                                                    | Efficacy         | Function       | Abduction ROM (°)                                                             | BSL, 1w, 2w, 3w, 4w, 5w, 6w | 1,2w: better for US               | some concern             |
|                                   |                      |                                                    | Efficacy         | Function       | External rotation ROM (°)                                                     | BSL, 1w, 2w, 3w, 4w, 5w, 6w | 2w: better for US                 | some concern             |
|                                   |                      |                                                    | Efficacy         | Function       | Internal rotation ROM (°)                                                     | BSL, 1w, 2w, 3w, 4w, 5w, 6w | 1,2,3,4w: better for US           | some concern             |
|                                   |                      |                                                    | Efficacy         | Function       | general shoulder functions - 10 functions by Cho et al                        | BSL, 1w, 2w, 3w, 4w, 5w, 6w | 1,2,3w: better for US             | some concern             |
|                                   |                      |                                                    |                  |                |                                                                               |                             |                                   |                          |
| Saeed et al., 2014                | shoulder impingement | glenohumeral joint, biceps tendon sheath, AC joint | Safety           | Pain           | Improvement in Patient Pain VAS from BSL (%)                                  | BSL, 6w, 12w                | 6,12w: better for US              | high                     |
|                                   |                      |                                                    | Efficacy         | Function       | Hawkins Kennedy test and supraspinatus tendon tenderness                      | BSL, 6w, 12w                | 6,12w: better for US <sup>6</sup> | high                     |

|                             |                                           |                           |           |                           |                                                                                                        |                               |                                             |              |
|-----------------------------|-------------------------------------------|---------------------------|-----------|---------------------------|--------------------------------------------------------------------------------------------------------|-------------------------------|---------------------------------------------|--------------|
|                             |                                           |                           | Efficacy  | Treatment response        | Improvement in Physician global assessment from BSL (%)                                                | BSL, 6w, 12w                  | 6,12w: better for US                        | high         |
|                             |                                           |                           | Efficacy  | Treatment failure         | Need for reinjection or surgery (%)                                                                    | up to 12w                     | no difference                               | high         |
| Naredo et al., 2004         | Periarticular shoulder disorders          | SA-SD bursa               | Accuracy  | Accuracy                  | Intra-target verified by corticosteroid detection in the SA-SD bursa via US after the intervention (%) | Post-procedure                | Post-procedure: better for US <sup>7</sup>  | high         |
|                             |                                           |                           | Safety    | Pain                      | Patient Pain VAS (mm)                                                                                  | BSL, 6w                       | 6w: better for US                           | some concern |
|                             |                                           |                           | Safety    | Adverse events            | Complications <sup>8</sup> (n°)                                                                        | Post-procedure                | no difference                               | some concern |
|                             |                                           |                           | Efficacy  | Function                  | Shoulder Function Assessment                                                                           | BSL, 6w                       | 6w: better for US                           | some concern |
|                             |                                           |                           |           |                           |                                                                                                        |                               |                                             |              |
| Hashiuchi et al., 2011      | Anterior shoulder pain                    | biceps tendon sheath      | Accuracy  | Accuracy                  | Intra-target verified by contrast agent detection via CT in tendon sheath (%)                          | Post-procedure                | Post-procedure: better for US               | some concern |
| Zhang et al., 2011          | Biceps brachii tendinitis                 | brachial bicipital groove | Safety    | Pain                      | Patient Pain VAS (cm)                                                                                  | BSL, last FU <sup>9</sup>     | last FU: better for US                      | high         |
|                             |                                           |                           | Safety    | Adverse events            | Complications <sup>4</sup> (%)                                                                         | up to the last FU             | no difference                               | high         |
|                             |                                           |                           | Efficacy  | Pain Function             | Constant Murley Score                                                                                  | BSL, last FU                  | up to the last FU: better for US            | high         |
|                             |                                           |                           | Efficacy  | Treatment failure         | Need for reinjection (%)                                                                               | up to the last FU             | up to the last FU: better for US            | high         |
|                             |                                           |                           | Efficacy  | Treatment failure         | Need for arthroscopic surgery (%)                                                                      | up to the last FU             | no difference <sup>10</sup>                 | high         |
| Yiannakopoulos et al., 2020 | Tendinosis of the long head of the biceps | long biceps tendon        | Accuracy  | Accuracy                  | Intra-target verified by fluid in the tendon sheath according to sonography (%)                        | post-procedure                | post-procedure: better for US <sup>11</sup> | high         |
|                             |                                           |                           | Safety    | Pain                      | Patient Pain VAS (cm)                                                                                  | BSL, during procedure, 4w, 6m | during procedure, 4w, 6m: better for US     | high         |
|                             |                                           |                           | Safety    | Adverse Events            | Complications (%) <sup>12</sup>                                                                        | up to 6m                      | no difference                               | high         |
|                             |                                           |                           | Efficacy  | QoL                       | SANE score <sup>13</sup>                                                                               | BSL, 4w, 6m                   | 4w, 6m: better for US                       | high         |
|                             |                                           |                           | Efficacy  | Symptom Severity Function | QuickDASH                                                                                              | BSL, 4w, 6m                   | 4w, 6m: better for US                       | high         |
|                             |                                           |                           | Cost/Time | Time                      | Duration of procedure <sup>14</sup>                                                                    | during procedure              | during procedure: better for US             | high         |
| Chang et al., 2014          | Scapular pain                             | subscapularis muscle      | Safety    | Pain                      | Patient Pain VAS (cm)                                                                                  | BSL, 1w, 2w, 3w, 3m           | no difference                               | some concern |
|                             |                                           |                           | Safety    | Adverse events            | Complications <sup>15</sup> (%)                                                                        | up to 3m                      | no difference                               | some concern |

|                         |                         |                    | Efficacy  | Treatment response              | Rubin scale                                                                   | 1w, 3m                                             | no difference                                                 | some concern |
|-------------------------|-------------------------|--------------------|-----------|---------------------------------|-------------------------------------------------------------------------------|----------------------------------------------------|---------------------------------------------------------------|--------------|
| Kim et al., 2013        | Elbow OA                | Elbow joint        | Accuracy  | Accuracy                        | Intra-target verified by contrast medium in joint according to X-ray exam (%) | Post-procedure                                     | Post-procedure: better for US                                 | some concern |
| Luz et al., 2008        | RA with wrist synovitis | wrist joint        | Accuracy  | Accuracy                        | Intra-target verified by contrast medium in joint according to X-ray exam (%) | Post-procedure                                     | no difference                                                 | some concern |
|                         |                         |                    | Safety    | Pain                            | Pain VAS at rest (cm)                                                         | BSL, 1w, 4w, 8w, 12w                               | no difference                                                 | some concern |
|                         |                         |                    | Safety    | Symptom severity                | VAS for oedema (cm)                                                           | BSL, 1w, 4w, 8w, 12w                               | no difference                                                 | some concern |
|                         |                         |                    | Efficacy  | Function                        | HAQ                                                                           | BSL, 1w, 4w, 8w, 12w                               | no difference                                                 | some concern |
| Mitchell et al., 2018   | trochanteric bursitis   | Trochanteric bursa | Safety    | Pain                            | Patient Pain VAS (cm)                                                         | BSL, during procedure, 2w, 6m                      | 6m: better for US                                             | high         |
|                         |                         |                    | Safety    | Adverse events                  | Complications <sup>16</sup> (%)                                               | n.a. <sup>4</sup>                                  | no difference                                                 | high         |
|                         |                         |                    | Efficacy  | Duration of therapeutic effects | until VAS ≥ 2 cm (months)                                                     | up to 6m                                           | no difference                                                 | high         |
|                         |                         |                    | Efficacy  | Time to next intervention       | Time to the next intervention <sup>17</sup> (months)                          | up to 12m                                          | no difference                                                 | high         |
|                         |                         |                    | Cost/Time | Costs                           | Costs per patient per year (US dollars)                                       | n.a. <sup>4</sup>                                  | worse for US                                                  | high         |
| Sibbitt Jr et al., 2011 | knee OA                 | knee joint         | Safety    | Pain                            | Patient Pain VAS (cm)                                                         | BSL, needle introduction, during injection, 2w, 6m | needle introduction, during injections, 2w, 6m: better for US | some concern |
|                         |                         |                    | Efficacy  | Duration of therapeutic effects | Until VAS≥2 (months)                                                          | up to 6m                                           | up to 6m: better for US                                       | some concern |
|                         |                         |                    | Efficacy  | Time to next intervention       | Until reinjection/surgery (months)                                            | up to 12m                                          | no difference                                                 | some concern |
|                         |                         |                    | Cost/Time | Costs                           | Cost per year–physician’s office (US dollars)                                 | up to 12m                                          | up to 12m: worse for US                                       | some concern |
|                         |                         |                    | Cost/Time | Costs                           | Costs per year–hospital outpatient department (US dollars)                    | up to 12m                                          | no difference                                                 | some concern |
| Bum Park et al., 2012   | knee OA                 | knee joint         | Accuracy  | Accuracy                        | Intra-target verified by contrast medium in joint according to X-ray exam (%) | Post-procedure                                     | Post-procedure: better for US                                 | some concern |
| Jang et al., 2013       | knee OA                 | knee joint         | Accuracy  | Accuracy                        | Intra-target verified by contrast medium in joint according to X-ray exam (%) | Post-procedure                                     | Post-procedure: better for US                                 | some concern |
|                         |                         |                    | Safety    | Adverse events                  | Complications <sup>18</sup> (%)                                               | during procedure                                   | during procedure: better for US                               | some concern |
|                         |                         |                    | Cost/Time | Time                            | time from skin cleansing to injection (min)                                   | during procedure                                   | no difference                                                 | some concern |

|                          |                 |            |          |                       |                                                                 |                           |                                     |              |
|--------------------------|-----------------|------------|----------|-----------------------|-----------------------------------------------------------------|---------------------------|-------------------------------------|--------------|
| Cankurtaran et al., 2020 | chronic knee OA | knee       | Safety   | Pain                  | Changes in Patient Pain VAS (mm)                                | BSL, 1m, 3m <sup>19</sup> | no difference                       | high         |
|                          |                 |            | Safety   | Adverse events        | Complications (n) <sup>20</sup>                                 | up to 3m                  | no difference                       | high         |
|                          |                 |            | Efficacy | Treatment response    | Changes in WOMAC                                                | BSL, 1m, 3m <sup>19</sup> | no difference                       | high         |
|                          |                 |            | Efficacy | QoL                   | Changes in Nottingham Health Profile - pain scale               | BSL, 1m, 3m <sup>19</sup> | 3m-BSL: worse for US                | high         |
|                          |                 |            | Efficacy | QoL                   | Changes in Nottingham Health Profile - emotional reaction scale | BSL, 1m, 3m <sup>19</sup> | 3m-BSL: worse for US                | high         |
|                          |                 |            | Efficacy | QoL                   | Changes in Nottingham Health Profile - sleep scale              | BSL, 1m, 3m <sup>19</sup> | no difference                       | high         |
|                          |                 |            | Efficacy | QoL                   | Changes in Nottingham Health Profile - social isolation scale   | BSL, 1m, 3m <sup>19</sup> | 1m-BSL: worse for US                | high         |
|                          |                 |            | Efficacy | QoL                   | Changes in Nottingham Health Profile - physical mobility scale  | BSL, 1m, 3m <sup>19</sup> | no difference                       | high         |
|                          |                 |            | Efficacy | QoL                   | Changes in Nottingham Health Profile - energy scale             | BSL, 1m, 3m <sup>19</sup> | no difference                       | high         |
|                          |                 |            | Efficacy | Treatment response    | Changes in Timed Up and Go Test (min) <sup>21</sup>             | BSL, 1m, 3m <sup>19</sup> | no difference                       | high         |
|                          |                 |            | Efficacy | Treatment response    | Changes in 6 - minute walk test (meters) <sup>22</sup>          | BSL, 1m, 3m <sup>19</sup> | 1m-BSL: better for US               | high         |
|                          |                 |            | Efficacy | Treatment response    | Changes in 30-second chair stand test (n) <sup>23</sup>         | BSL, 1m, 3m <sup>19</sup> | 1m-BSL, 3m-1m: better for US        | high         |
|                          |                 |            | Efficacy | Treatment response    | Changes in stair climb test (min)                               | BSL, 1m, 3m <sup>19</sup> | no difference                       | high         |
| Sibbitt et al., 2012     | knee effusion   | knee joint | Accuracy | Tissue/Fluid acquired | Aspirated fluid volume (ml)                                     | Post-procedure            | Post-procedure: better for US       | some concern |
|                          |                 |            | Accuracy | Tissue/Fluid acquired | Adequate amount for diagnostics: ≥2.5 mL (%)                    | Post-procedure            | Post-procedure: better for US       | some concern |
|                          |                 |            | Safety   | Pain                  | Patient Pain VAS (cm)                                           | BSL, during procedure, 2w | during procedure, 2w: better for US | some concern |

|                                    |                               |                      |           |                      |                                                                                              |                                |                                             |              |
|------------------------------------|-------------------------------|----------------------|-----------|----------------------|----------------------------------------------------------------------------------------------|--------------------------------|---------------------------------------------|--------------|
| Im et al., 2009                    | knee OA                       | knee joint           | Accuracy  | Accuracy             | Intra-target verified by contrast medium in joint according to X-ray exam (%)                | Post-procedure                 | Post-procedure: better for US               | some concern |
| Lundstrom et al., 2019             | Receiving knee injection      | knee joint           | Efficacy  | Treatment failure    | received knee arthroplasty (%)                                                               | up to 6y                       | up to 6y: better for US                     | Serious      |
|                                    |                               |                      | Efficacy  | Treatment failure    | reinjection with hyaluronic acid (%)                                                         | up to 6y                       | up to 6y: worse for US                      | Serious      |
|                                    |                               |                      | Efficacy  | Treatment failure    | reinjection with corticosteroid (%)                                                          | up to 6y                       | up to 6y: better for US                     | Serious      |
| Sheth et al., 2020                 | Receiving knee injection      | Knee                 | Safety    | Pain                 | Patient Pain VAS (cm) <sup>24</sup>                                                          | BSL, Post-procedure, 4-6w      | Post-procedure, 4-6w: better for US         | high         |
|                                    |                               |                      | Efficacy  | Patient satisfaction | Patient satisfaction on a Likert Scale                                                       | Post-procedure, 4-6w           | Post-procedure, 4-6w: better for US         | high         |
|                                    |                               |                      | Efficacy  | Treatment response   | Improvement in the KOOS symptoms score                                                       | BSL, 4-6w                      | BSL, 4-6w: better for US                    | high         |
|                                    |                               |                      | Efficacy  | Treatment response   | Improvement in KOOS pain score                                                               | BSL, 4-6w                      | BSL, 4-6w: better for US                    | high         |
|                                    |                               |                      | Efficacy  | Treatment response   | Improvement in KOOS activity of daily living score                                           | BSL, 4-6w                      | BSL, 4-6w: better for US                    | high         |
|                                    |                               |                      | Efficacy  | Treatment response   | Improvement in KOOS sports and recreation score                                              | BSL, 4-6w                      | BSL, 4-6w: better for US                    | high         |
|                                    |                               |                      | Efficacy  | Treatment response   | Improvement in KOOS quality of life score                                                    | BSL, 4-6w                      | BSL, 4-6w: better for US                    | high         |
| Lee et al., 2019                   | Pes anserinus tendinobursitis | Pes anserinus bursa  | Accuracy  | Accuracy             | Intra-target verified by injection material in target structure according to sonography (%)  | Postprocedure                  | post-procedure: better for US <sup>25</sup> | some concern |
|                                    |                               |                      | Safety    | Pain                 | Patient Pain VAS reduction from BSL <sup>26</sup> (cm)                                       | BSL, 1w, 4w                    | 1,4w: better for US                         | some concern |
|                                    |                               |                      | Safety    | Adverse Events       | Complications (%)                                                                            | up to 4w                       | no difference                               | some concern |
| ULTRASOUND vs. FLUOROSCOPY         |                               |                      |           |                      |                                                                                              |                                |                                             |              |
| Pescavage -Thomas and Gustas, 2016 | Anterior shoulder pain        | biceps tendon sheath | Accuracy  | Accuracy             | Intra-target verified by contrast medium in tendon sheath according to US or fluoroscopy (%) | Post-procedure                 | Post-procedure: better for US               | serious      |
|                                    |                               |                      | Safety    | Pain                 | Patient Pain VAS change (cm)                                                                 | n.a. <sup>4</sup>              | no difference                               | serious      |
|                                    |                               |                      | Safety    | Adverse events       | Complications <sup>4</sup> (%)                                                               | 1m-3m                          | no difference                               | serious      |
|                                    |                               |                      | Cost/Time | Costs                | Professional and technical fees <sup>27</sup> (US dollars)                                   | n.a. <sup>27</sup>             | n.a. <sup>27</sup>                          | serious      |
| Fowler et al., 2014                | Piriformis syndrome           | piriformis muscle    | Safety    | Pain                 | Patient Pain NRS (cm)                                                                        | BSL, post-procedure, 1w-2w, 3m | no difference                               | high         |

|                                               |                                 |            |           |                      |                                                                               |                                 |                                |              |
|-----------------------------------------------|---------------------------------|------------|-----------|----------------------|-------------------------------------------------------------------------------|---------------------------------|--------------------------------|--------------|
|                                               |                                 |            | Safety    | Adverse events       | Complications <sup>28</sup> (%)                                               | BSL, 1w-2w, 3m                  | no difference                  | high         |
|                                               |                                 |            | Efficacy  | Function             | Multidimensional Pain Inventory                                               | BSL, 1w-2w, 3m                  | no differences <sup>29</sup>   | high         |
|                                               |                                 |            | Efficacy  | Patient satisfaction | Global Impression of Change scale                                             | BSL, 1w-2w, 3m                  | no difference                  | high         |
|                                               |                                 |            | Cost/Time | Time                 | imaging time, needling time, total performance time (min)                     | BSL, 1w-2w, 3m                  | no difference                  | high         |
| Soneji et al., 2016                           | chronic SIJ arthritis           | SIJ        | Accuracy  | Accuracy             | Intra-target verified by contrast medium in the joint via fluoroscopy (%)     | During procedure                | no difference                  | some concern |
|                                               |                                 |            | Safety    | Pain                 | Patient Pain NRS (cm)                                                         | BSL, 24h, 72h, 1w, 1m, 3m       | no difference                  | some concern |
|                                               |                                 |            | Safety    | Pain                 | Procedural discomfort (cm)                                                    | During procedure                | no difference                  | some concern |
|                                               |                                 |            | Efficacy  | Function             | Oswestry Disability Index                                                     | BSL, 1m                         | no difference                  | some concern |
|                                               |                                 |            | Efficacy  | Pain medication      | Daily opioid consumption (mg)                                                 | BSL, 1m                         | no difference                  | some concern |
|                                               |                                 |            | Cost/Time | Time                 | Time from intervention start to end (sec) <sup>30</sup>                       | During procedure                | During procedure: worse for US | some concern |
| Jee et al., 2014                              | Noninflammatory SIJ Dysfunction | SIJ        | Accuracy  | Accuracy             | Intra-target verified by contrast medium in joint according to X-ray exam (%) | Post-procedure                  | Post-procedure: worse for US   | high         |
|                                               |                                 |            | Safety    | Pain                 | Patient Verbal numeric pain scale (cm)                                        | BSL, 2w, 12w                    | no difference                  | some concern |
|                                               |                                 |            | Safety    | Adverse events       | Complications <sup>31</sup> (%)                                               | Post-procedure, 2w, 12w         | no difference                  | high         |
|                                               |                                 |            | Efficacy  | Function             | Oswestry Disability Index                                                     | BSL, 2w, 12w                    | no difference                  | some concern |
|                                               |                                 |            | Efficacy  | Patient satisfaction | 5-point patient satisfaction scale                                            | BSL, 2w, 12w                    | no difference                  | high         |
| Kim et al., 2019                              | Chronic knee OA                 | knee joint | Safety    | Pain                 | 11-point pain scale                                                           | BSL, 3m, 6m                     | no difference                  | some concern |
|                                               |                                 |            | Safety    | Adverse events       | Complications <sup>4</sup> (%)                                                | Up to 6m                        | no difference                  | some concern |
|                                               |                                 |            | Efficacy  | Treatment response   | WOMAC                                                                         | BSL, 3m, 6m                     | no difference                  | some concern |
|                                               |                                 |            | Efficacy  | Treatment response   | Composite treatment response score <sup>32</sup>                              | 3m                              | no difference                  | some concern |
|                                               |                                 |            | Efficacy  | Patient satisfaction | 7-point patient satisfaction scale                                            | 3m                              | no difference                  | some concern |
| ULTRASOUND/FLUOROSCOPY vs. PALPATION GUIDANCE |                                 |            |           |                      |                                                                               |                                 |                                |              |
| Bossert et al., 2016                          | ankle OA                        | ankle      | Safety    | Pain                 | Patient Pain VAS when walking (cm)                                            | time of interview <sup>33</sup> | no difference                  | 14/20        |

|                                                   |                                  |                        |           |                           |                                                                                    |                                 |                                                                           |         |
|---------------------------------------------------|----------------------------------|------------------------|-----------|---------------------------|------------------------------------------------------------------------------------|---------------------------------|---------------------------------------------------------------------------|---------|
|                                                   |                                  |                        | Efficacy  | Function                  | Patient definition of severe impairment (%)                                        | time of injection               | no difference                                                             | 14/20   |
|                                                   |                                  |                        | Efficacy  | Patient satisfaction      | Satisfied/Unsatisfied (%)                                                          | time of injection               | time of injection: better for US/Fluo                                     | 14/20   |
|                                                   |                                  |                        | Efficacy  | Treatment response        | Patient definition of treatment efficacy (%)                                       | time of interview <sup>33</sup> | time of interview: better for US/Fluo                                     | 14/20   |
|                                                   |                                  |                        | Efficacy  | Pain medication           | Patients needing pain medication (%)                                               | time of interview <sup>33</sup> | no difference                                                             | 14/20   |
|                                                   |                                  |                        | Efficacy  | Patient satisfaction      | Patient definition of intervention tolerability (%)                                | time of interview <sup>33</sup> | no difference                                                             | 14/20   |
| FLUOROSCOPY vs. PALPATION GUIDANCE                |                                  |                        |           |                           |                                                                                    |                                 |                                                                           |         |
| Cohen et al., 2019                                | painful SIJ                      | SIJ                    | Accuracy  | location of the injection | Intra-target verified by contrast medium in the joint according to radiography (%) | Post-procedure                  | Post-procedure: better for fluoroscopy                                    | low     |
|                                                   |                                  |                        | Safety    | Pain                      | Average patient pain VAS of back and buttock (cm)                                  | BSL, 1m, 3m                     | no difference                                                             | low     |
|                                                   |                                  |                        | Safety    | Pain                      | Worst pain VAS of the last week (cm)                                               | BSL, 1m, 3m                     | no difference                                                             | low     |
|                                                   |                                  |                        | Safety    | Adverse Events            | Complications (n) <sup>34</sup>                                                    | up to 3m                        | no difference                                                             | low     |
|                                                   |                                  |                        | Safety    | Pain                      | Adjusted average patient pain VAS of back and buttock (cm) <sup>35</sup>           | 1m, 3m                          | 3m: better for fluoroscopy                                                | low     |
|                                                   |                                  |                        | Safety    | Pain                      | Adjusted worst pain VAS of the last week (cm) <sup>35</sup>                        | 1m, 3m                          | 3m: better for fluoroscopy                                                | low     |
|                                                   |                                  |                        | Efficacy  | Function                  | Oswestry Disability Index                                                          | BSL, 1m, 3m                     | no difference                                                             | low     |
|                                                   |                                  |                        | Efficacy  | Pain medication           | Reduction in analgesic use (%) <sup>36</sup>                                       | 1m, 3m                          | no difference                                                             | low     |
|                                                   |                                  |                        | Efficacy  | Patient satisfaction      | Patient satisfaction on a Likert Scale                                             | 1m, 3m                          | no difference                                                             | low     |
|                                                   |                                  |                        | Efficacy  | Function                  | Adjusted Oswestry Disability Index <sup>35</sup>                                   | 1m, 3m                          | no difference                                                             | low     |
| ULTRASOUND vs. FLUOROSCOPY vs. PALPATION GUIDANCE |                                  |                        |           |                           |                                                                                    |                                 |                                                                           |         |
| Henne et al., 2020                                | Hip OA or FAI                    | hip                    | Cost/Time | Costs                     | Costs for OA (U.S. Dollars) <sup>37</sup>                                          | post-procedure                  | post-procedure: better for palpation guidance/US compared to fluo.        | serious |
|                                                   |                                  |                        | Cost/Time | Costs                     | Costs for FIA 27 (U.S. Dollars) <sup>37</sup>                                      | post-procedure                  | post-procedure: better for US and palpation guidance/US compared to fluo. | serious |
| FLUOROSCOPY vs. COMPUTED TOMOGRAPHY               |                                  |                        |           |                           |                                                                                    |                                 |                                                                           |         |
| Diffre et al., 2020                               | pyogenic vertebral osteomyelitis | disco-vertebral tissue | Accuracy  | Tissue/Fluid acquired     | Positive rate of disco-vertebral biopsy cultures (%) <sup>38</sup>                 | n.a. <sup>4</sup>               | at lumbar level: better for fluo. <sup>39</sup>                           | serious |
|                                                   |                                  |                        | Safety    | Adverse Events            | Complications (n) <sup>40</sup>                                                    | n.a. <sup>4</sup>               | no difference                                                             | serious |

The abbreviation BSL (baseline) refers to the time point before the intervention happened

AC joint, acromioclavicular joint; BSL, baseline; CT, computer tomography; FIA, femoroacetabular impingement: Fluo, fluoroscopy; HAQ, health assessment questionnaire; KOOS, Knee injury and osteoarthritis outcome score; last FU, last follow-up; m, month(s); NRS, numeric rating scale; OA, osteoarthritis; RA, rheumatoid arthritis; ROM, range of motion; Sane, Single Assessment Numeric evaluation; SA-SD bursa, subacromial-subdeltoid bursa; SIJ, sacroiliac joint; US, ultrasound; U.S. Dollars, United States of America Dollars; w, week(s); WOMAC, Western Ontario and McMaster Universities Osteoarthritis Index; y, year(s);

---

<sup>1</sup> The outcomes "Complications" are usually only presented in descriptive manner by the respective authors. Statistical tests were not performed by the authors, unless stated otherwise.

<sup>2</sup> No difference = at none of the give time points a difference was found between the groups. If differences were found, the time point for the differences is depicted.

<sup>3</sup> For details on the RoB assessment see supplementary table 3.

<sup>4</sup> Not specified by authors

<sup>5</sup> Improvement in extension was better at 1 week and 4 weeks in the US group compare to baseline. Extension was however significantly better before the intervention in the palpation guidance group, making the detection of a difference difficult.

<sup>6</sup> At baseline the US group had significantly worse scores (the Hawkins-Kennedy test and supraspinatus tendon tenderness) compared to the palpation guidance group, however significantly greater improvements were noted for 6 and 12 weeks in the US group, with overall better scores at these two time-points in the US group.

<sup>7</sup> In the palpation guidance group corticosteroids were found exclusively in the SA-SD bursa only in 3/20 cases, while in the US group corticosteroids were found exclusively in the SA-SD bursa in 20/21 cases. A statistical test was not performed.

<sup>8</sup> Only reported complication was mild pain.

<sup>9</sup> The last follow up visit was different for each patient. The mean follow-up time was 31 weeks (range, 24 to 53) in the palpation guidance group and 34 weeks (range, 25 to 56) in the US group

<sup>10</sup> For 9/45 patients in the palpation guidance group and 5/53 patients in the US group, who complained of refractory pain after three separate injections, arthroscopic surgery was performed. This outcome was not compared using a statistical test.

<sup>11</sup> Correct fluid placement was found in 100% of the cases in the US group and in 68.12% cases in the palpation guidance group. A statistical comparison was not performed

<sup>12</sup> including tendon rupture, vascular injury, and infection. None of them happened

<sup>13</sup> "How would you rate your affected joint/region of interest today as a percentage of normal (0% to 100% scale with 100% being normal)?"

<sup>14</sup> "The duration of the injection was recorded in all instances" - no more information

<sup>15</sup> No serious complications such as pneumothorax or infection, or symptoms attributable to the side effects of steroid were encountered.

<sup>16</sup> There were no complications in any group, including no infections, patient injuries, nerve injuries, vascular complications, or unintended needle sticks.

<sup>17</sup> Interventions include reinjections, surgery, physical therapy, splint referral, joint imaging, referral to another specialist

<sup>18</sup> Complications were defined as the needle touching the patella cartilage or periosteum. No other complications occurred.

<sup>19</sup> Outcomes were shown as changes between BSL and 1 month, 1 month and 3 months and BSL and 3 months

<sup>20</sup> No complications reported

<sup>21</sup> The TUGT involves the patient getting up from a chair, walking 3 meters, and returning to sit in the same chair. After the patient completed the test we noted the completion time.

<sup>22</sup> performed in a 30-meterlong corridor, and measured the total distance walked in meters over 6 minutes

<sup>23</sup> test that counts the total number of complete chair stands within 30 seconds

<sup>24</sup> the 4-6 w timepoint was either done via clinical exam or via telephone survey

---

<sup>25</sup> VAS score reduction was measured while constant force was applied to the PA by an examiner with a pressure algometer (FPK-5Wagner Instruments)

<sup>26</sup> Correct injection material placement was found in 25/25 of the cases in the US group and in 2/25 cases in the palpation guidance group. A statistical comparison was not performed

<sup>27</sup> The journal states: "... the total combined ultrasound charges were \$105 less than the combined fluoroscopy charges." However, no information is given how these results were calculated, especially for what time frame, and whether they were statistically compared.

<sup>28</sup> No complications including infection, severe bruising or bleeding, allergic reaction, seizure, admission to the hospital, severe or worsening pain lasting more than one day post-procedure, leg weakness occurred.

<sup>29</sup> Parts of the Multidimensional pain index showed significant differences at baseline, making conclusions on superiority of one method at follow-up difficult.

<sup>30</sup> In the fluoroscopy group, procedure timing was defined as time between first fluoroscopic image and completion of injection. In the US group, timing was defined as time from application of the US probe to completion of injection (including fluoroscopic confirmation of needle tip location)

<sup>31</sup> The following complications occurred in the study: Pain in periosteum, leg weakness

<sup>32</sup> Score defined as:  $\geq 50\%$  pain reduction, WOMAC unchanged,  $\geq 4$  on patient satisfaction scale OR  $\geq 30\%$  pain reduction,  $\geq 30\%$  WOMAC reduction OR  $> 5$  on patient satisfaction scale

<sup>33</sup> The time between the intervention and the interview was different for each patient. The mean (SD) weeks since intervention were 20.5 (11.8), 15.5 (8.9) and 17.1 (8.9) for the fluoroscopy, US and palpation guidance group respectively.

<sup>34</sup> Complications included worsening of back pain and temporary neurological symptoms

<sup>35</sup> In adjusted comparisons, the authors calculated differences in treatment effects and 95%CI for pain and disability scores with analysis of covariance adjusting for baseline values of pain.

<sup>36</sup> cessation of at least 1 nonopioid analgesic or at least a 20% reduction in opioid use

<sup>37</sup> Costs were determined based on reimbursement data from the insurance company to the payees, which included not only the injection costs, but any other charges that the patient might have incurred on the day of procedure

<sup>38</sup> The Gold Standard was the diagnosis of pyogenic vertebral osteomyelitis, including radiological, clinical and biological data.

<sup>39</sup> No difference between the methods at cervical, thoracical and total spine level

<sup>40</sup> No complications reported, such as hemorrhage, infection, fracture or major pneumothorax

References

BOSSERT, M., BOUBLIL, D., PARISAU, J.-M., BOZGAN, A.-M., RICHELME, E. & CONROZIER, T. 2016. Imaging Guidance Improves the Results of Viscosupplementation with HANOX-M-XL in Patients with Ankle Osteoarthritis: Results of a Clinical Survey in 50 Patients Treated in Daily Practice. *Clinical medicine insights. Arthritis and musculoskeletal disorders*, 9, 195-199.

BUM PARK, Y., AH CHOI, W., KIM, Y. K., CHUL LEE, S. & HAE LEE, J. 2012. Accuracy of blind versus ultrasound-guided suprapatellar bursal injection. *J Clin Ultrasound*, 40, 20-5.

CANKURTARAN, D., KARAAHMET, O. Z., YILDIZ, S. Y., EKSIÖGLÜ, E., DULGEROĞLU, D. & UNLU, E. 2020. Comparing the effectiveness of ultrasound guided versus blind genicular nerve block on pain, muscle strength with isokinetic device, physical function and quality of life in chronic knee osteoarthritis: a prospective randomized controlled study. *The Korean journal of pain*, 33, 258-266.

CHANG, W. H., KIM, Y. W., CHOI, S. & LEE, S. C. 2014. Comparison of the therapeutic effects of intramuscular subscapularis and scapulothoracic bursa injections in patients with scapular pain: A randomized controlled trial. *Rheumatology International*, 34, 1203-1209.

COHEN, S. P., BICKET, M. C., KURIHARA, C., GRIFFITH, S. R., FOWLER, I. M., JACOBS, M. B., LIU, R., ANDERSON WHITE, M., VERDUN, A. J., HARI, S. B., FISHER, R. L., PASQUINA, P. F. & VOROBAYCHIK, Y. 2019. Fluoroscopically Guided vs Landmark-Guided Sacroiliac Joint Injections: A Randomized Controlled Study. *Mayo Clinic Proceedings*, 94, 628-642.

DIFFRE, C., JOUSSET, C., ROUX, A. L., DURAN, C., NOUSSAIR, L., ROTTMAN, M., CARLIER, R. Y. & DINH, A. 2020. Predictive factors for positive disco-vertebral biopsy culture in pyogenic vertebral osteomyelitis, and impact of fluoroscopic versus scanographic guidance. *BMC Infectious Diseases*, 20.

FOWLER, I. M., TUCKER, A. A., WEIMERSKIRCH, B. P., MORAN, T. J. & MENDEZ, R. J. 2014. A randomized comparison of the efficacy of 2 techniques for piriformis muscle injection: ultrasound-guided versus nerve stimulator with fluoroscopic guidance. *Regional Anesthesia & Pain Medicine*, 39, 126-32.

HASHIUCHI, T., SAKURAI, G., MORIMOTO, M., KOMEI, T., TAKAKURA, Y. & TANAKA, Y. 2011. Accuracy of the biceps tendon sheath injection: Ultrasound-guided or unguided injection? A randomized controlled trial. *Journal of Shoulder and Elbow Surgery*, 20, 1069-1073.

HENNE, M., CENTURION, A., ZEINI, I. M., YOUMANS, D. H. & OSBAHR, D. C. 2020. Trends in Utilization of Image Guidance for Hip Joint Injections. *Clinical journal of sport medicine : official journal of the Canadian Academy of Sport Medicine*.

IM, S. H., LEE, S. C., PARK, Y. B., CHO, S.-R. & KIM, J. C. 2009. Feasibility of Sonography for Intra-articular Injections in the Knee Through a Medial Patellar Portal. *Journal of Ultrasound in Medicine*, 28, 1465-1470.

JANG, S. H., LEE, S. C., LEE, J. H., NAM, S. H., CHO, K. R. & PARK, Y. 2013. Comparison of ultrasound (US)-guided intra-articular injections by in-plain and out-of-plain on medial portal of the knee. *Rheumatol Int*, 33, 1951-9.

JEE, H., LEE, J. H., PARK, K. D., AHN, J. & PARK, Y. 2014. Ultrasound-guided versus fluoroscopy-guided sacroiliac joint intra-articular injections in the noninflammatory sacroiliac joint dysfunction: a prospective, randomized, single-blinded study. *Arch Phys Med Rehabil*, 95, 330-7.

KIM, D. H., LEE, M. S., LEE, S., YOON, S. H., SHIN, J. W. & CHOI, S. S. 2019. A Prospective Randomized Comparison of the Efficacy of Ultrasound- vs Fluoroscopy-Guided Genicular Nerve Block for Chronic Knee Osteoarthritis. *Pain Physician*, 22, 139-146.

KIM, T. K., LEE, J. H., PARK, K. D., LEE, S. C., AHN, J. & PARK, Y. 2013. Ultrasound versus palpation guidance for intra-articular injections in patients with degenerative osteoarthritis of the elbow. *J Clin Ultrasound*, 41, 479-85.

LEE, H. J., LIM, K. B., KIM, D. Y. & LEE, K. T. 2009. Randomized controlled trial for efficacy of intra-articular injection for adhesive capsulitis: ultrasonography-guided versus blind technique. *Arch Phys Med Rehabil*, 90, 1997-2002.

LEE, J. H., LEE, J. U. & YOO, S. W. 2019. Accuracy and efficacy of ultrasound-guided pes anserinus bursa injection. *Journal of clinical ultrasound : JCU*, 47, 77-82.

LUNDSTROM, Z. T., SYTSM, T. T. & GREENLUND, L. S. 2019. Rethinking Viscosupplementation: Ultrasound- Versus Landmark-Guided Injection for Knee Osteoarthritis. *Journal of Ultrasound in Medicine*, n/a.

LUZ, K. R., FURTADO, R. N., NUNES, C. C., ROSENFELD, A., FERNANDES, A. R. & NATOUR, J. 2008. Ultrasound-guided intra-articular injections in the wrist in patients with rheumatoid arthritis: a double-blind, randomised controlled study. *Ann Rheum Dis*, 67, 1198-200.

MITCHELL, W. G., KETTICH, S. C., SIBBITT, W. L., JR., SIBBITT, R. R., MURUGANANDAM, M., ROLLE, N. A., HAYWARD, W. A., FIELDS, R. A., ROLDAN, L. P., EMIL, N. S., FANGTHAM, M. & BANKHURST, A. D. 2018. Outcomes and cost-effectiveness of ultrasound-guided injection of the trochanteric bursa. *Rheumatol Int*, 38, 393-401.

NAREDO, E., CABERO, F., BENEYTO, P., CRUZ, A., MONDEJAR, B., USON, J., PALOP, M. J. & CRESPO, M. 2004. A randomized comparative study of short term response to blind injection versus sonographic-guided injection of local corticosteroids in patients with painful shoulder. *Journal of Rheumatology*, 31, 308-14.

PETSCAVAGE-THOMAS, J. & GUSTAS, C. 2016. Comparison of Ultrasound-Guided to Fluoroscopy-Guided Biceps Tendon Sheath Therapeutic Injection. *Journal of ultrasound in medicine : official journal of the American Institute of Ultrasound in Medicine*, 35, 2217-2221.

RAEISSADAT, S. A., RAYEGANI, S. M., LANGROUDI, T. F. & KHOINIHA, M. 2017. Comparing the accuracy and efficacy of ultrasound-guided versus blind injections of steroid in the glenohumeral joint in patients with shoulder adhesive capsulitis. *Clinical Rheumatology*, 36, 933-940.

SAEED, A., KHAN, M., MORRISSEY, S., KANE, D. & FRASER, A. D. 2014. Impact of outpatient clinic ultrasound imaging in the diagnosis and treatment for shoulder impingement: a randomized prospective study. *Rheumatology International*, 34, 503-9.

SHETH, T., MIRANDA, O. M. & JOHNSON, B. 2020. Assessment of patient satisfaction, functionality, and quality of life after ultrasound-guided knee intervention: a prospective study. *Clinical Rheumatology*.

SIBBITT JR, W. L., BAND, P. A., KETTICH, L. G., CHAVEZ-CHIANG, N. R., DELEA, S. L. & BANKHURST, A. D. 2011. A randomized controlled trial evaluating the cost-effectiveness of sonographic guidance for intra-articular injection of the osteoarthritic knee. *Journal of Clinical Rheumatology*, 17, 409-415.

SIBBITT, W. L., JR., KETTICH, L. G., BAND, P. A., CHAVEZ-CHIANG, N. R., DELEA, S. L., HASELER, L. J. & BANKHURST, A. D. 2012. Does ultrasound guidance improve the outcomes of arthrocentesis and corticosteroid injection of the knee? *Scandinavian Journal of Rheumatology*, 41, 66-72.

SONEJI, N., BHATIA, A., SEIB, R., TUMBER, P., DISSANAYAKE, M. & PENG, P. W. H. 2016. Comparison of Fluoroscopy and Ultrasound Guidance for Sacroiliac Joint Injection in Patients with Chronic Low Back Pain. *Pain Practice*, 16, 537-544.

YIANNAKOPOULOS, C. K., MEGALOIKONOMOS, P. D., FOUFA, K. & GLIATIS, J. 2020. Ultrasound-guided versus palpation-guided corticosteroid injections for tendinosis of the long head of the biceps: A randomized comparative study. *Skeletal Radiology*, 49, 585-591.

ZHANG, J., EBRAHEIM, N. & LAUSE, G. E. 2011. Ultrasound-guided injection for the biceps brachii tendinitis: results and experience. *Ultrasound Med Biol*, 37, 729-33.
