# Supplementary material for: Value of imaging to guide interventional procedures in rheumatic and musculoskeletal diseases: a systematic literature review informing EULAR points to consider
Source: HighWire-hosted journal article supplement (doi:10.1136/rmdopen-2021-001864), 2021-11-01
Supplement: rmdopen-2021-001864supp006_data_supplement.pdf [file rmdopen-2021-001864supp006_data_supplement.pdf]

**Supplementary table 5. Outcome details for studies comparing different imaging techniques or imaging vs. palpation guidance at small joints and periarticular structures (PICO1)**

| AUTOR, YEAR                                              | DISEASE             | SITE                        | OUTCOME CATEGORY | OUTCOME DETAIL       | OUTCOME EXPLANATION (UNIT) <sup>1</sup>                                       | TIME POINT                        | RESULTS <sup>2</sup>           | OVERALL ROB <sup>3</sup> |
|----------------------------------------------------------|---------------------|-----------------------------|------------------|----------------------|-------------------------------------------------------------------------------|-----------------------------------|--------------------------------|--------------------------|
| <b>ULTRASOUND vs. PALPATION GUIDANCE</b>                 |                     |                             |                  |                      |                                                                               |                                   |                                |                          |
| Park et al., 2015                                        | AC joint OA         | AC joint                    | Accuracy         | Accuracy             | Intra-target verified by contrast medium in joint according to X-ray exam (%) | Post-procedure                    | Post-procedure: better for US  | Serious                  |
|                                                          |                     |                             | Safety           | Function Pain        | Shoulder Pain and Disability Index (%)                                        | BSL, 1m, 3m, 6m                   | 6m: better for US              | Serious                  |
|                                                          |                     |                             | Safety           | Pain                 | Verbal Numeric Pain Scale at rest (cm)                                        | BSL, 1m, 3m, 6m                   | no difference                  | Serious                  |
|                                                          |                     |                             | Safety           | Pain                 | Verbal Numeric Pain Scale under local pressure (cm)                           | BSL, 1m, 3m, 6m                   | 6m: better for US              | Serious                  |
| Hak Roh et al., 2019                                     | trigger finger      | finger flexor tendon sheath | Safety           | Pain                 | Patient Pain VAS (cm)                                                         | BSL, 3m, 6m                       | no difference                  | some concern             |
|                                                          |                     |                             | Safety           | Adverse events       | Complications <sup>4</sup> (n)                                                | BSL, 3m, 6m                       | no difference                  | some concern             |
|                                                          |                     |                             | Efficacy         | Function             | QuickDASH                                                                     | BSL, 3m, 6m                       | no difference                  | some concern             |
|                                                          |                     |                             | Efficacy         | Patient satisfaction | 5-point scale                                                                 | n.a. <sup>5</sup>                 | BSL: better for US             | some concern             |
| Lee et al., 2018                                         | trigger finger      | A1 pulley                   | Safety           | Pain                 | Patient Pain VAS (cm)                                                         | BSL, 2w, 4w, last FU <sup>6</sup> | 2,4w: better for US            | some concern             |
|                                                          |                     |                             | Safety           | Adverse events       | Complications <sup>7</sup> (%)                                                | last FU <sup>6</sup>              | no difference                  | some concern             |
|                                                          |                     |                             | Efficacy         | Function             | PIP contracture (°)                                                           | BSL, last FU <sup>6</sup>         | no difference                  | some concern             |
|                                                          |                     |                             | Efficacy         | Patient satisfaction | Satisfied/Unsatisfied (%)                                                     | last FU <sup>6</sup>              | no difference                  | some concern             |
| Cecen et al., 2015                                       | trigger finger      | A1 pulley                   | Safety           | Pain                 | Patient Pain VAS (cm)                                                         | BSL, 6w, 6m                       | no difference                  | high                     |
|                                                          |                     |                             | Safety           | Adverse events       | Complications <sup>8</sup> (%)                                                | BSL, 6w, 6m                       | no difference                  | high                     |
|                                                          |                     |                             | Efficacy         | Function             | Quinnell grading                                                              | BSL, 6w, 6m                       | no difference                  | high                     |
|                                                          |                     |                             | Efficacy         | Treatment failure    | need for a second injection (%)                                               | BSL, 6w, 6m                       | no difference                  | high                     |
| Pan et al., 2019                                         | trigger finger      | A1 pulley                   | Efficacy         | Function             | Amount of triggering (%) – semiquantitative scale                             | BSL, post-procedure, 1w           | no difference <sup>9</sup>     | high                     |
|                                                          |                     |                             | Cost/Time        | Time                 | Duration of operation (min)                                                   | during procedure                  | During procedure: worse for US | high                     |
| <b>ULTRASOUND vs. FLUOROSCOPY vs. PALPATION GUIDANCE</b> |                     |                             |                  |                      |                                                                               |                                   |                                |                          |
| Gershkovich et al., 2019                                 | Thumb CMC arthritis | CMC joint of the thumb      | Efficacy         | Treatment failure    | Patients needing surgery (%)                                                  | n.a. <sup>5</sup>                 | no difference <sup>10</sup>    | serious                  |

|                                                              |     |     |           |                           |                                                            |                                      |                                                                                                |         |
|--------------------------------------------------------------|-----|-----|-----------|---------------------------|------------------------------------------------------------|--------------------------------------|------------------------------------------------------------------------------------------------|---------|
|                                                              |     |     | Efficacy  | Time to next intervention | Time from the first injection to the moment of surgery (d) | n.a. <sup>5</sup>                    | better for palpation guidance compared to US                                                   | serious |
|                                                              |     |     | Efficacy  | Time to next intervention | Time between the injections (d) <sup>11</sup>              | n.a. <sup>5</sup>                    | better for fluoroscopy compared to US for the time between 2nd and 3rd injection <sup>12</sup> | serious |
|                                                              |     |     | Cost/Time | Costs                     | Costs including physician charges and facility charges     | n.a. <sup>5</sup>                    | worse for US <sup>13</sup>                                                                     | serious |
| <b>ULTRASOUND/COMPUTED TOMOGRAPHY vs. PALPATION GUIDANCE</b> |     |     |           |                           |                                                            |                                      |                                                                                                |         |
| Resnick et al., 2017                                         | JIA | TMJ | Safety    | Pain                      | Decrease in pain (%)                                       | BSL, FU <sup>14</sup>                | no difference                                                                                  | 14/20   |
|                                                              |     |     | Efficacy  | Anatomical differences    | Increase in maximal incisal opening <sup>15</sup> (mm)     | BSL, FU <sup>14</sup>                | no difference                                                                                  | 14/20   |
|                                                              |     |     | Efficacy  | Treatment response        | Decrease in synovial enhancement ratio <sup>16</sup>       | BSL <sup>17</sup> , FU <sup>18</sup> | no difference                                                                                  | 14/20   |
|                                                              |     |     | Cost/Time | Time                      | Unilateral procedure times <sup>19</sup> (min)             | Post-procedure                       | Post-procedure: worse for US                                                                   | 14/20   |
|                                                              |     |     | Cost/Time | Time                      | Bilateral Procedure times <sup>19</sup> (min)              | Post-procedure                       | Post-procedure: worse for US                                                                   | 14/20   |

The abbreviation BSL (baseline) refers to the time point before the intervention happened

AC joint, Acromioclavicular joint; BSL, Baseline; CMC, carpometacarpal; d, day(s); Fluo., fluoroscopy; JIA, Juvenile idiopathic arthritis; Last FU, last follow-up; m, month(s); PIP, Proximal interphalangeal joint; Quick DASH, Quick Disability of Arm, Shoulder and Hand; TMJ, temporomandibular joint; US, Ultrasound; VAS, visual analogue scale; w, week(s);

<sup>1</sup> The outcomes "Complications" are usually only presented in descriptive manner by the respective authors. Statistical tests were not performed by the authors, unless stated otherwise.

<sup>2</sup> No difference = at none of the give time points a difference was found between the groups. If differences were found, the time point for the differences is depicted.

<sup>3</sup> For details on RoB see supplementary table 3

<sup>4</sup> Described complications included: steroid flare, skin discoloration or subcutaneous fat atrophy, symptoms of digital nerve irritation (tingling/numbness), superficial infection

<sup>5</sup> Not described by the authors

<sup>6</sup> The time point for the last follow-up visit is not described

<sup>7</sup> Complications included: tenderness around the scar, loss of sensation, and presence of infection

<sup>8</sup> Complications included: hemorrhage, hypopigmentation, atrophy of subcutaneous fat, infection, and tendon rupture (none of them happened)

<sup>9</sup> Patients were grouped semi quantitatively according to their amount of triggering (0/1/2/3/4 - 4 is worst triggering). The results at baseline days were (% of patients): US: 0/0/10/50/40 vs palpation guidance 0/0/9.5/38/52.4. After the procedure the results were palpation guidance: 0/76.1/14.2/4.8/4.8 vs US: 52.4/40/5/0/0, while after 7 days the results were palpation guidance: 19/71.4/0/4.8/4.8 vs US: 100/0/0/0. A statistical test was not performed.

<sup>10</sup> The percentage of patients having surgery in the US, fluoroscopy and palpation guidance group respectively: 27.8%, 17.1%, 10.5%. No statistical test performed

<sup>11</sup> The total n° of days between the 1st and the 2nd, the 2nd and the 3rd and the 3rd and the 4th injection

<sup>12</sup> Longer time in the fluoroscopy group by an average number of 9.4 days compared to US. All other comparisons between injections and methods showed no significant differences.

<sup>13</sup> Average US costs: 768\$ (SD 1132), Fluoroscopy costs: 517\$ (SD 608), palpation guidance group costs: 565\$ (SD 777). No statistical comparisons were performed

<sup>14</sup> The mean ± SD clinical follow-up was 22.6 ± 4.3 months

<sup>15</sup> Maximal incisal opening was assessed using a rigid triangle or ruler while the patient was asked to open the mouth to the point of restriction.

---

<sup>16</sup> Synovial enhancement (Synovitis) ratio was calculated from coronal postcontrast fatsaturated T1-weighted MRI series comparing enhancement of the TMJ synovium with the longus capitis muscle

<sup>17</sup> Baseline magnetic resonance images were obtained an average of  $2.14 \pm 1.35$  months before the intervention

<sup>18</sup> Follow up magnetic resonance images were obtained an average of  $6.38 \pm 2.4$  months after intervention

<sup>19</sup> Procedure times were determined from the anesthesia record for each encounter

## References

- CECEN, G. S., GULABI, D., SAGLAM, F., TANJU, N. U. & BEKLER, H. I. 2015. Corticosteroid injection for trigger finger: Blinded or ultrasound-guided injection? *Archives of Orthopaedic and Trauma Surgery*, 135, 125-131.
- GERSHKOVICH, G. E., BOYADJIAN, H. & CONTI MICA, M. 2019. The Effect of Image-Guided Corticosteroid Injections on Thumb Carpometacarpal Arthritis. *Hand (New York, N.Y.)*, 1558944719846572.
- HAK ROH, Y., KIM, S., SIK GONG, H. & HYUN BAEK, G. 2019. A randomized comparison of ultrasound-guided versus landmark-based corticosteroid injection for trigger finger. *The Journal of hand surgery, European volume*, 1753193419839892.
- LEE, S. H., CHOI, Y. C. & KANG, H. J. 2018. Comparative study of ultrasonography-guided percutaneous A1 pulley release versus blinded percutaneous A1 pulley release. *Journal of Orthopaedic Surgery*, 26.
- PAN, M., SHENG, S., FAN, Z., LU, H., YANG, H., YAN, F. & E, Z. 2019. Ultrasound-Guided Percutaneous Release of A1 Pulley by Using a Needle Knife: A Prospective Study of 41 Cases. *Frontiers in pharmacology*, 10, 267-267.
- PARK, K. D., KIM, T. K., LEE, J., LEE, W. Y., AHN, J. K. & PARK, Y. 2015. Palpation Versus Ultrasound-Guided Acromioclavicular Joint Intra-articular Corticosteroid Injections: A Retrospective Comparative Clinical Study. *Pain Physician*, 18, 333-41.
- RESNICK, C. M., VAKILIAN, P. M., KABAN, L. B. & PEACOCK, Z. S. 2017. Is Intra-Articular Steroid Injection to the Temporomandibular Joint for Juvenile Idiopathic Arthritis More Effective and Efficient When Performed With Image Guidance? *Journal of Oral & Maxillofacial Surgery*, 75, 694-700.
