# Supplementary material for: Value of imaging to guide interventional procedures in rheumatic and musculoskeletal diseases: a systematic literature review informing EULAR points to consider
Source: HighWire-hosted journal article supplement (doi:10.1136/rmdopen-2021-001864), 2021-11-01
Supplement: rmdopen-2021-001864supp007_data_supplement.pdf [file rmdopen-2021-001864supp007_data_supplement.pdf]

**Supplementary table 6. Outcome details for studies comparing different imaging techniques or imaging vs. palpation guidance at multiple joints and periarticular structures (PICO1)**

| AUTHOR, DATE                              | DISEASE                                   | SITE                   | OUTCOME CATEGORY | OUTCOME DETAIL                  | OUTCOME EXPLANATION (UNIT) <sup>1</sup>                                       | TIME POINT                                         | RESULTS <sup>2</sup>                                         | OVERALL ROB <sup>3</sup> |
|-------------------------------------------|-------------------------------------------|------------------------|------------------|---------------------------------|-------------------------------------------------------------------------------|----------------------------------------------------|--------------------------------------------------------------|--------------------------|
| <b>ULTRASOUND vs. PALPATION GUIDANCE</b>  |                                           |                        |                  |                                 |                                                                               |                                                    |                                                              |                          |
| Sibbitt Jr et al., 2011                   | Inflammatory Arthritis                    | joints                 | Safety           | Pain                            | Patient Pain VAS (cm)                                                         | BSL, needle introduction, during injection, 2w, 6m | Needle introduction, during injection, 2w, 6m: better for US | some concern             |
|                                           |                                           |                        | Efficacy         | Duration of therapeutic effects | Until VAS≥2 (months)                                                          | Up to 6m                                           | Up to 6m: better for US                                      | some concern             |
|                                           |                                           |                        | Efficacy         | Time to next intervention       | Until reinjection/surgery (months)                                            | Up to 12m                                          | Up to 12m: better for US                                     | some concern             |
|                                           |                                           |                        | Cost/Time        | Costs                           | Cost per year—physician's office (U.S. Dollars)                               | Up to 12m                                          | Up to 12m: worse for US                                      | some concern             |
|                                           |                                           |                        | Cost/Time        | Costs                           | Costs per year—hospital outpatient (U.S. dollars)                             | Up to 12m                                          | no difference                                                | some concern             |
| Cunnington et al., 2010                   | Inflammatory Arthritis                    | joints                 | Accuracy         | Accuracy                        | Intra-target verified by contrast medium in joint according to X-ray exam (%) | Post-procedure                                     | postprocedure: better for US                                 | some concern             |
|                                           |                                           |                        | Safety           | Pain                            | Patient Pain VAS (cm)                                                         | BSL, 2w, 6w                                        | no difference                                                | some concern             |
|                                           |                                           |                        | Efficacy         | Function                        | Function VAS (cm)                                                             | BSL, 2w, 6w                                        | no difference                                                | some concern             |
|                                           |                                           |                        | Efficacy         | Function                        | Stiffness VAS (cm)                                                            | BSL, 2w, 6w                                        | no difference                                                | some concern             |
|                                           |                                           |                        | Efficacy         | Function                        | modified HAQ                                                                  | BSL, 2w, 6w                                        | no difference                                                | some concern             |
|                                           |                                           |                        | Efficacy         | QoL                             | Change in EuroQol 5 VAS score from BSL                                        | BSL, 2w, 6w                                        | 2w: worse for US                                             | some concern             |
|                                           |                                           |                        | Efficacy         | QoL                             | Change in EuroQol 5 index from BSL                                            | BSL, 2w, 6w                                        | 6w: better for US                                            | some concern             |
| Sibbitt et al., 2009                      | Painful arthritic joints (RA, OA)         | large and small joints | Safety           | Pain                            | Patient Pain VAS (cm)                                                         | BSL, during procedure, 2w                          | during procedure, 2w: better for US                          | some concern             |
|                                           |                                           |                        | Efficacy         | Treatment response              | ≥ 50%reduction in VAS pain-score (%)                                          | 2w                                                 | 2w: better for US                                            | some concern             |
|                                           |                                           |                        | Efficacy         | Treatment failure               | < 50%reduction in VAS pain-score (%)                                          | 2w                                                 | 2w: better for US                                            | some concern             |
| Nordberg et al., 2018                     | Early RA                                  | joints                 | Efficacy         | Treatment response              | Decrease of swollen joints from BSL (%)                                       | BSL, 12m                                           | no difference                                                | some concern             |
| Balint et al., 2002                       | Patients for joint/soft tissue aspiration | joints/soft tissue     | Accuracy         | Accuracy                        | Successful aspirations (%)                                                    | During procedure                                   | During procedure: better for US <sup>4</sup>                 | 13/20                    |
|                                           |                                           |                        | Accuracy         | Tissue/Fluid acquired           | Mean amount of measurable fluid obtained (ml)                                 | Post-procedure                                     | no difference                                                | 13/20                    |
| <b>ULTRASOUND vs. COMPUTED TOMOGRAPHY</b> |                                           |                        |                  |                                 |                                                                               |                                                    |                                                              |                          |

|                                                          |                                             |                    |          |                       |                                                                    |                |               |          |
|----------------------------------------------------------|---------------------------------------------|--------------------|----------|-----------------------|--------------------------------------------------------------------|----------------|---------------|----------|
| McKee et al., 2020                                       | image-guided synovial biopsies <sup>5</sup> | multiple joints    | Accuracy | Tissue/Fluid acquired | Positive yield for synovial tissue/pathology (%) <sup>6</sup>      | post-procedure | no difference | serious  |
| <b>ULTRASOUND vs. PALPATION GUIDANCE vs. ARTHROSCOPY</b> |                                             |                    |          |                       |                                                                    |                |               |          |
| Humby et al., 2018                                       | Inflammatory arthritis                      | Small/large joints | Accuracy | Tissue/Fluid acquired | proportion of gradable synovial tissue fragments per procedure (%) | Post-procedure | no difference | critical |
|                                                          |                                             |                    | Accuracy | Tissue/Fluid acquired | total graded synovial tissue area (mm <sup>2</sup> )               | Post-procedure | no difference | critical |
|                                                          |                                             |                    | Accuracy | Tissue/Fluid acquired | synovial tissue area per graded tissue fragment (%)                | Post-procedure | no difference | critical |
|                                                          |                                             |                    | Accuracy | Tissue/Fluid acquired | Histological synovitis semiquantitative score                      | Post-procedure | no difference | critical |
|                                                          |                                             |                    | Accuracy | Tissue/Fluid acquired | Total weight of RNA (mcg)                                          | Post-procedure | no difference | critical |
|                                                          |                                             |                    | Accuracy | Tissue/Fluid acquired | RNA integrity semiquantitative score                               | Post-procedure | no difference | critical |

The abbreviation BSL (baseline) refers to the time point before the intervention happened

BSL, baseline; EuroQoL, Euro-Quality of life; FU, follow up; HAQ, health assessment questionnaire; m, month(s); OA, osteoarthritis; QoL, quality of life; RA, rheumatoid arthritis; U.S. dollars, United States of America Dollars; US, ultrasound; VAS, visual analogue scale; w, week(s);

<sup>1</sup> The outcomes "Complications" are usually only presented in descriptive manner by the respective authors. Statistical tests were not performed by the authors, unless stated otherwise.

<sup>2</sup> No difference = at none of the give time points a difference was found between the groups. If differences were found, the time point for the differences is depicted.

<sup>3</sup> For details on RoB see supplementary table 3

<sup>4</sup> In the US group 31/32 and in the palpation guidance group 10/32 joints were successfully punctured with fluid aspiration. A statistical test was not performed.

<sup>5</sup> Correct injection placement was found in 25/25 of the cases in the US group and in 2/25 cases in the palpation guidance group. A statistical comparison was not performed

<sup>6</sup> A positive yield for the image-guided synovial biopsy was defined as evidence of synovial tissue, neoplasm, or inflammatory changes within the biopsy specimen

## References

- BALINT, P. V., KANE, D., HUNTER, J., MCINNES, I. B., FIELD, M. & STURROCK, R. D. 2002. Ultrasound guided versus conventional joint and soft tissue fluid aspiration in rheumatology practice: a pilot study. *J Rheumatol*, 29, 2209-13.
- CUNNINGTON, J., MARSHALL, N., HIDE, G., BRACEWELL, C., ISAACS, J., PLATT, P. & KANE, D. 2010. A randomized, double-blind, controlled study of ultrasound-guided corticosteroid injection into the joint of patients with inflammatory arthritis. *Arthritis Rheum*, 62, 1862-9.
- HUMBY, F., ROMAO, V. C., MANZO, A., FILER, A., BUGATTI, S., VIEIRA-SOUSA, E., KELLY, S., WECHALEKAR, M., AHMED, M., ROCHER, V., HANDS, R., MONTECUCCO, C., FONSECA, J. & PITZALIS, C. 2018. A Multicenter Retrospective Analysis Evaluating Performance of Synovial Biopsy Techniques in Patients With Inflammatory Arthritis: Arthroscopic Versus Ultrasound-Guided Versus Blind Needle Biopsy. *Arthritis & Rheumatology*, 70, 702-710.
- MCKEE, T. C., BELAIR, J. A., SOBOL, K., BROWN, S. A., ABRAHAM, J. & MORRISON, W. 2020. Efficacy of image-guided synovial biopsy. *Skeletal Radiology*, 49, 921-928.
- NORDBERG, L. B., LILLEGRAVEN, S., AGA, A. B., SEXTON, J., LIE, E., HAMMER, H. B., OLSEN, I. C., UHLIG, T., VAN DER HEIJDE, D., KVIEN, T. K. & HAAVARDSHOLM, E. A. 2018. The Impact of Ultrasound on the Use and Efficacy of Intraarticular Glucocorticoid Injections in Early Rheumatoid Arthritis: Secondary Analyses From a Randomized Trial Examining the Benefit of Ultrasound in a Clinical Tight Control Regimen. *Arthritis Rheumatol*, 70, 1192-1199.
- SIBBITT JR, W. L., BAND, P. A., CHAVEZ-CHIANG, N. R., DELEA, S. L., NORTON, H. E. & BANKHURST, A. D. 2011. A randomized controlled trial of the cost-effectiveness of ultrasound-guided intraarticular injection of inflammatory arthritis. *Journal of Rheumatology*, 38, 252-63.
- SIBBITT, W. L., JR., PEISAJOVICH, A., MICHAEL, A. A., PARK, K. S., SIBBITT, R. R., BAND, P. A. & BANKHURST, A. D. 2009. Does sonographic needle guidance affect the clinical outcome of intraarticular injections? *J Rheumatol*, 36, 1892-902.
