# Supplementary material for: Value of imaging to guide interventional procedures in rheumatic and musculoskeletal diseases: a systematic literature review informing EULAR points to consider
Source: HighWire-hosted journal article supplement (doi:10.1136/rmdopen-2021-001864), 2021-11-01
Supplement: rmdopen-2021-001864supp009_data_supplement.pdf [file rmdopen-2021-001864supp009_data_supplement.pdf]

Supplementary table 8. Outcome details for studies on imaging settings and technical standards (PICO2)

| AUTHOR, DATE                                     | DISEASE                                      | SETTINGS - SITE                                                 | INTERVENTION (COMPOUND)                                                                  | OUTCOME CATEGORY | OUTCOME DETAIL        | OUTCOME EXPLANATION (UNIT) <sup>1</sup>                                   | TIME POINT                | RESULTS <sup>2</sup>                                | OVERALL ROB <sup>3</sup> |
|--------------------------------------------------|----------------------------------------------|-----------------------------------------------------------------|------------------------------------------------------------------------------------------|------------------|-----------------------|---------------------------------------------------------------------------|---------------------------|-----------------------------------------------------|--------------------------|
| <b>LARGE JOINTS AND PERIARTICULAR STRUCTURES</b> |                                              |                                                                 |                                                                                          |                  |                       |                                                                           |                           |                                                     |                          |
| Orlandi et al., 2017                             | Rotator cuff calcific tendinopathy           | one Needle vs. two needles - SA-SD Bursa                        | US guided aspiration, injection (heated saline, 200mg 2% mepivacaine, 1ml triamcinolone) | Accuracy         | Tissue/Fluid acquired | Subjective ease of calcium dissolution on a semiquantitative scale        | During procedure          | no difference                                       | Some concerns            |
|                                                  |                                              |                                                                 |                                                                                          | Safety           | Pain Function         | Constant Score                                                            | BSL, 1m, 3m, 1y           | no difference                                       | Some concerns            |
|                                                  |                                              |                                                                 |                                                                                          | Safety           | Adverse events        | Immediate Complications <sup>4</sup> (%)                                  | Post-procedure            | no difference                                       | Some concerns            |
|                                                  |                                              |                                                                 |                                                                                          | Safety           | Adverse events        | Subacromial Bursitis (%)                                                  | 1y                        | no difference                                       | Some concerns            |
|                                                  |                                              |                                                                 |                                                                                          | Efficacy         | Treatment failure     | Change of the one needle method to the two needle method (%)              | During procedure          | During procedure: worse for one needle <sup>5</sup> | Some concerns            |
|                                                  |                                              |                                                                 |                                                                                          | Efficacy         | Treatment failure     | Needle obstruction (%)                                                    | During procedure          | During procedure: worse for one needle              | Some concerns            |
|                                                  |                                              |                                                                 |                                                                                          | Cost/Time        | Time                  | Procedure duration from first needle insertion to steroid injection (sec) | Post-procedure            | no difference                                       | Some concerns            |
| Sibbitt et al., 2012                             | palpably effusive knees (43 RA, 21 OA)       | mechanical vs. automatic syringe - knee joint                   | US guided joint aspiration, injection (5ml 1% lidocaine, 80mg triamcinolone)             | Accuracy         | Tissue/Fluid acquired | Aspirated fluid (ml)                                                      | Post-procedure            | no difference                                       | Some concerns            |
|                                                  |                                              |                                                                 |                                                                                          | Safety           | Pain                  | Patient Pain VAS (cm)                                                     | BSL, during procedure, 2w | no difference                                       | Some concerns            |
| <b>MULTIPLE JOINTS</b>                           |                                              |                                                                 |                                                                                          |                  |                       |                                                                           |                           |                                                     |                          |
| Just et al., 2018                                | Inflammatory arthritis, degenerative disease | US-NB vs US-P&F vs Arthroscopy - wrist/knee/MCP/ankle/elbow/MTP | Synovial biopsy                                                                          | Safety           | Pain                  | Patient Pain VAS (mm)                                                     | BSL, 1w-2w                | no difference                                       | Moderate                 |
|                                                  |                                              |                                                                 |                                                                                          | Safety           | Adverse events        | Complications <sup>6</sup> (n°)                                           | n.a. <sup>7</sup>         | no difference                                       | Moderate                 |

|          |                      |                                              |                   |                                                |          |
|----------|----------------------|----------------------------------------------|-------------------|------------------------------------------------|----------|
| Efficacy | Function             | Patient Stiffness VAS (mm)                   | BSL, 1w-2w        | no difference                                  | Moderate |
| Efficacy | Function             | Patient Swelling VAS (mm)                    | BSL, 1w-2w        | no difference                                  | Moderate |
| Efficacy | Patient satisfaction | Willing to participate in another biopsy (%) | n.a. <sup>7</sup> | Better for US-P&F and arthroscopy <sup>8</sup> | Moderate |

The abbreviation BSL (baseline) refers to the time point before the intervention happened

m, month(s); MTP, metatarsophalangeal joint; NB, needle biopsy; OA, osteoarthritis; PF, portal and forceps; RA, rheumatoid arthritis; SA-SD bursa, subacromial-subdeltoid bursa; US, ultrasound; w, week(s); y, year(s);

<sup>1</sup> The outcomes "Complications" are usually only presented in descriptive manner by the respective authors. Statistical tests were not performed by the authors, unless stated otherwise.

<sup>2</sup> No difference = at none of the give time points a difference was found between the groups. If differences were found, the time point for the differences is depicted.

<sup>3</sup> For details on RoB see supplementary table 3

<sup>4</sup> Complications included only mild vagal reactions

<sup>5</sup> In seven of 107 patients (6.5%) treated with one needle who had a hard calcification, a leakage of fluid in the subacromial bursa and in the surrounding tissues was detected. In these patients, a second needle was used and the procedure was completed.

<sup>6</sup> Complications included syncope or presyncope, tenosynovitis, neurological disturbance (sensory but no motor impairment), hemarthrosis

<sup>7</sup> Not described by the authors

<sup>8</sup> Patients undergoing both US-P&F and arthroscopy were more willing than those undergoing US-NB to undergo a repeat procedure (US-P&F vs US-NB:  $p < 0.01$  and arthroscopy vs US-NB:  $p < 0.01$ ), while there was no significant difference between US-P&F and arthroscopy ( $p = 0.85$ ).

## References

- JUST, S. A., HUMBY, F., LINDEGAARD, H., MERIC DE BELLEFON, L., DUREZ, P., VIEIRA-SOUSA, E., TEIXEIRA, R., STOENOIU, M., WERLINRUD, J., ROSMARK, S., LARSEN, P. V., PRATT, A., CHOY, E., GENDI, N., BUCH, M. H., EDWARDS, C. J., TAYLOR, P. C., MCINNES, I. B., FONSECA, J. E., PITZALIS, C. & FILER, A. 2018. Patient-reported outcomes and safety in patients undergoing synovial biopsy: comparison of ultrasound-guided needle biopsy, ultrasound-guided portal and forceps and arthroscopic-guided synovial biopsy techniques in five centres across Europe. *RMD Open*, 4, e000799.
- ORLANDI, D., MAURI, G., LACELLI, F., CORAZZA, A., MESSINA, C., SILVESTRI, E., SERAFINI, G. & SCONFENZA, L. M. 2017. Rotator Cuff Calcific Tendinopathy: Randomized Comparison of US-guided Percutaneous Treatments by Using One or Two Needles. *Radiology*, 285, 518-527.
- SIBBITT, W. L., JR., KETTWICH, L. G., BAND, P. A., CHAVEZ-CHIANG, N. R., DELEA, S. L., HASELER, L. J. & BANKHURST, A. D. 2012. Does ultrasound guidance improve the outcomes of arthrocentesis and corticosteroid injection of the knee? *Scandinavian Journal of Rheumatology*, 41, 66-72.
