# Supplementary material for: Value of imaging to guide interventional procedures in rheumatic and musculoskeletal diseases: a systematic literature review informing EULAR points to consider
Source: HighWire-hosted journal article supplement (doi:10.1136/rmdopen-2021-001864), 2021-11-01
Supplement: rmdopen-2021-001864supp010_data_supplement.pdf [file rmdopen-2021-001864supp010_data_supplement.pdf]

Supplementary table 9. Outcome details for studies on procedural protocols for imaging guided interventions (PICO3)

| AUTHOR                                    | STUDY DESIGN | DISEASE                             | PROCEDURES - SITE                                                   | INTERVENTION (COMPOUND)                             | OUTCOME CATEGORY | OUTCOME DETAIL   | OUTCOME EXPLANATION (UNIT) <sup>1</sup>   | TIME POINT       | RESULTS <sup>2</sup>                   | OVERALL ROB <sup>3</sup> |
|-------------------------------------------|--------------|-------------------------------------|---------------------------------------------------------------------|-----------------------------------------------------|------------------|------------------|-------------------------------------------|------------------|----------------------------------------|--------------------------|
| LARGE JOINTS AND PERIARTICULAR STRUCTURES |              |                                     |                                                                     |                                                     |                  |                  |                                           |                  |                                        |                          |
| Khallaf et al., 2018                      | RCT          | adhesive capsulitis of the shoulder | GH/SASD approach - shoulder                                         | US guided injection (methylprednisolone, lidocaine) | Safety           | Pain             | Patient Pain VAS                          | BSL, 12w         | no difference                          | High                     |
|                                           |              |                                     |                                                                     |                                                     | Safety           | Pain Function    | Shoulder Pain and Disability index        | BSL, 12w         | 12w: better for GH approach            | High                     |
|                                           |              |                                     |                                                                     |                                                     | Efficacy         | Function         | Shoulder flexion ROM (°)                  | BSL, 12w         | no difference                          | High                     |
|                                           |              |                                     |                                                                     |                                                     | Efficacy         | Function         | Shoulder abduction ROM (°)                | BSL, 12w         | no difference                          | High                     |
|                                           |              |                                     |                                                                     |                                                     | Efficacy         | Function         | Shoulder extension ROM (°)                | BSL, 12w         | 12w: worse for GH approach             | High                     |
|                                           |              |                                     |                                                                     |                                                     | Efficacy         | Function         | Shoulder internal rotation ROM (°)        | BSL, 12w         | no differences <sup>4</sup>            | High                     |
|                                           |              |                                     |                                                                     |                                                     | Efficacy         | Function         | Shoulder external rotation ROM (°)        | BSL, 12w         | 12w: worse for GH approach             | High                     |
| Cho et al., 2016                          | RCT          | Frozen shoulder                     | Intrarticular (IA)/ Subacromial bursa (SA) or both (IA+SA) approach | US injection (triamcinolone, lidocaine)             | Safety           | Pain             | Shoulder pain VAS with motion (cm)        | BSL, 3w, 6w, 12w | Better for IA and IA+SA compared to SA | Low                      |
|                                           |              |                                     |                                                                     |                                                     | Safety           | Symptom severity | Subjective shoulder value (%)             | BSL, 3w, 6w, 12w | Better for IA and IA+SA compared to SA | Low                      |
|                                           |              |                                     |                                                                     |                                                     | Efficacy         | Function         | American Shoulder and Elbow Surgeon score | BSL, 3w, 6w, 12w | Better for IA and IA+SA compared to SA | Low                      |
|                                           |              |                                     |                                                                     |                                                     | Efficacy         | Function         | Forward flexion ROM (°)                   | BSL, 3w, 6w, 12w | no difference                          | Low                      |
|                                           |              |                                     |                                                                     |                                                     | Efficacy         | Function         | Abduction ROM (°)                         | BSL, 3w, 6w, 12w | no difference                          | Low                      |
|                                           |              |                                     |                                                                     |                                                     | Efficacy         | Function         | External rotation angle ROM (°)           | BSL, 3w, 6w, 12w | no difference                          | Low                      |
|                                           |              |                                     |                                                                     |                                                     | Efficacy         | Function         | Internal rotation ROM (°)                 | BSL, 3w, 6w, 12w | Better for IA and IA+SA compared to SA | Low                      |

|                      |                                     |                             |                                                           |                                                                                                                         |           |                       |                                                                                                         |                                                                                 |                                            |               |
|----------------------|-------------------------------------|-----------------------------|-----------------------------------------------------------|-------------------------------------------------------------------------------------------------------------------------|-----------|-----------------------|---------------------------------------------------------------------------------------------------------|---------------------------------------------------------------------------------|--------------------------------------------|---------------|
| Chang et al., 2014   | RCT                                 | patients with scapular pain | subscapular muscle/ scapulothoracic bursa approach        | Subscapular muscle: US guided injection<br>Scapulothoracic bursa: palpation guided injection (triamcinolone, lidocaine) | Safety    | Pain                  | Patient Pain VAS (cm)                                                                                   | BSL, 1w, 2w, 3w (after first injection) 12w (after last injection) <sup>5</sup> | no difference                              | Some concerns |
|                      |                                     |                             |                                                           |                                                                                                                         | Safety    | Adverse events        | Complications <sup>6</sup> (%)                                                                          | up to 12w (after last injection) <sup>5</sup>                                   | no difference                              | Some concerns |
|                      |                                     |                             |                                                           |                                                                                                                         | Efficacy  | Treatment response    | Rubin Scale                                                                                             | 1w (after first injection), 12w (after last injection) <sup>5</sup>             | no difference                              | Some concerns |
| Chang et al., 2015   | Retrospective cross sectional study | Diskitis osteomyelitis      | Bone (Endplate)/Disk or Paravertebral soft tissue - Spine | CT guided Biopsy                                                                                                        | Accuracy  | Tissue/Fluid acquired | % of true pos findings <sup>7</sup>                                                                     | BSL                                                                             | no difference                              | 7/20          |
|                      |                                     |                             |                                                           |                                                                                                                         | Accuracy  | Tissue/Fluid acquired | Sensitivity/Specificity <sup>8</sup>                                                                    | BSL                                                                             | no difference                              | 7/20          |
| Althoff et al., 2015 | Prospective cohort study            | Sacroiliitis                | intra-/periarticular approach - SIJ                       | CT guided injection (triamcinolone)                                                                                     | Safety    | Pain                  | Patient Pain VAS pain (cm)                                                                              | BSL, 1w, 1m, 3m, 6m                                                             | 3m, 6m: better for intraarticular approach | Serious       |
| Hartung et al., 2010 | Prospective cohort study            | Acute sacroiliitis          | Intra-/periarticular approach - SIJ                       | US guided injection (triamcinolone, gadolinium)                                                                         | Safety    | Pain                  | Numerical pain rating scale                                                                             | BSL, 1d, 4w                                                                     | no difference                              | Serious       |
| Jang et al., 2013    | RCT                                 | knee joint OA               | Out of -/ in plain US - knee                              | injection (lidocaine, triamcinolone, nonionic contrast agent)                                                           | Accuracy  | Accuracy              | Intra-target verified by contrast medium in joint according to X-ray exam (%)                           | Post-procedure                                                                  | no difference                              | some concern  |
|                      |                                     |                             |                                                           |                                                                                                                         | Safety    | Adverse events        | Complications <sup>9</sup> (%)                                                                          | BSL                                                                             | no difference                              | some concern  |
|                      |                                     |                             |                                                           |                                                                                                                         | Cost/Time | Time                  | skin cleansing to injection (min)                                                                       | BSL                                                                             | no difference                              | some concern  |
| Park et al., 2011    | RCT                                 | Knee OA                     | Medial-/ Midlateral or Superolateral portal - knee        | US guided injection (lidocaine, triamcinolone, nonionic contrast agent)                                                 | Accuracy  | Accuracy              | Intra-target verified by contrast medium in suprapatellar pouch or meniscus according to X-ray exam (%) | Post-procedure                                                                  | no difference                              | Some concerns |
|                      |                                     |                             |                                                           |                                                                                                                         | Safety    | Adverse events        | Complications <sup>10</sup> (%)                                                                         | Up to 4w                                                                        | no difference                              | Some concerns |

|                                           |                      |                        |                                                             |                                                                                   |          |                                    |                                                                                                                |                    |                                                      |               |
|-------------------------------------------|----------------------|------------------------|-------------------------------------------------------------|-----------------------------------------------------------------------------------|----------|------------------------------------|----------------------------------------------------------------------------------------------------------------|--------------------|------------------------------------------------------|---------------|
| Park et al., 2013                         | RCT                  | Knee OA                | Midmedial- /<br>midlateral or<br>superolateral<br>portal    | US guided injection<br>(nonionic contrast<br>medium, lidocaine,<br>triamcinolone) | Accuracy | Accuracy                           | Intra-target verified by contrast medium<br>in suprapatellar pouch or meniscus<br>according to X-ray exam (%)  | Post-procedure     | no difference                                        | Some concerns |
|                                           |                      |                        |                                                             |                                                                                   | Safety   | Adverse events                     | Complications <sup>11</sup> (%)                                                                                | n.a. <sup>12</sup> | no difference                                        | Some concerns |
| SMALL JOINTS AND PERIARTICULAR STRUCTURES |                      |                        |                                                             |                                                                                   |          |                                    |                                                                                                                |                    |                                                      |               |
| Sabeti-<br>Aschraf et<br>al., 2013        | RCT<br>(Multicentre) | AC joint<br>arthralgia | Intra-<br>/periarticular<br>approach – AC<br>joint          | US Injection<br>(lidocaine,<br>betamethasone)                                     | Safety   | Pain Function                      | Constant-Murley Score                                                                                          | BSL, 1h, 1w, 3w    | no difference                                        | Low           |
|                                           |                      |                        |                                                             |                                                                                   | Safety   | Pain                               | pressure pain VAS (cm)                                                                                         | BSL, 1h, 1w, 3w    | no difference                                        | Low           |
|                                           |                      |                        |                                                             |                                                                                   | Safety   | Pain                               | pain at night VAS (cm)                                                                                         | BSL, 1h, 1w, 3w    | no difference                                        | Low           |
|                                           |                      |                        |                                                             |                                                                                   | Safety   | Pain                               | Crossover arm test                                                                                             | BSL, 1h, 1w, 3w    | BSL, 1h, 1,3w: Better for<br>intraarticular approach | Some concerns |
|                                           |                      |                        |                                                             |                                                                                   | Safety   | Adverse events                     | Complications <sup>13</sup> (%)                                                                                | Up to 3w           | no difference                                        | Low           |
| Shinomiya<br>et al., 2016                 | RCT                  | Trigger<br>finger      | Intra- / extra<br>sheath approach<br>– A1 pulley<br>fingers | Injection<br>(triamcinolone,<br>mepivacaine)                                      | Safety   | Pain/Treatment<br>success          | Pain remission rate <sup>14</sup> (%)                                                                          | BSL, 4w            | no difference                                        | Some concerns |
|                                           |                      |                        |                                                             |                                                                                   | Safety   | Adverse events                     | Complications <sup>15</sup> (%)                                                                                | 4w                 | no difference                                        | Some concerns |
|                                           |                      |                        |                                                             |                                                                                   | Efficacy | Function/Treatment<br>success      | Finger Snapping remission rate <sup>14</sup> (%)                                                               | BSL, 4w            | no difference                                        | Some concerns |
|                                           |                      |                        |                                                             |                                                                                   | Efficacy | Fuction/Treatment<br>success       | PIP flexion contracture (>10°) <sup>14</sup><br>remission rate (%)                                             | BSL, 4w            | no difference                                        | Some concerns |
|                                           |                      |                        |                                                             |                                                                                   | Efficacy | Duration of<br>therapeutic effects | Recurrence of symptoms (months)                                                                                | 4w                 | no difference                                        | High          |
|                                           |                      |                        |                                                             |                                                                                   | Efficacy | Anatomical<br>differences          | The maximal thicknesses of the A1<br>pulley (mm) <sup>16</sup>                                                 | BSL, 4w            | no difference                                        | Some concerns |
|                                           |                      |                        |                                                             |                                                                                   | Efficacy | Anatomical<br>differences          | The maximal thicknesses of the flexor<br>digitorum tendons at the level of the A1<br>pulley (mm) <sup>16</sup> | BSL, 4w            | no difference                                        | Some concerns |

|                             |                            |                |                                                  |                                                                 |          |                                |                                                |                            |                                         |               |
|-----------------------------|----------------------------|----------------|--------------------------------------------------|-----------------------------------------------------------------|----------|--------------------------------|------------------------------------------------|----------------------------|-----------------------------------------|---------------|
| Mardani-Kivi et al., 2018   | RCT                        | trigger finger | Intra-/extra sheath approach – A1 pulley fingers | US injections (methylprednisolone, lidocaine)                   | Safety   | Pain Function                  | Quinnell grading system                        | BSL, 3w, 6w, 12w, 24w, 48w | no difference                           | Some concerns |
|                             |                            |                |                                                  |                                                                 | Efficacy | Treatment failure              | Need for repeated injection (n°)               | BSL, 3w, 6w, 12w, 24w, 48w | no difference                           | Some concerns |
| <b>NERVES</b>               |                            |                |                                                  |                                                                 |          |                                |                                                |                            |                                         |               |
| Babaei-Ghazani et al., 2018 | RCT                        | CTS            | Above/below median nerve - carpal tunnel         | US guided injection (triamcinolone)                             | Safety   | Adverse events                 | Complications <sup>17</sup> (%)                | Post-procedure, 6w, 12w    | no difference                           | Some concerns |
|                             |                            |                |                                                  |                                                                 | Safety   | Pain                           | Patient Pain VAS (cm)                          | BSL, 6w, 12w               | no difference                           | Some concerns |
|                             |                            |                |                                                  |                                                                 | Safety   | Symptom severity               | BCTQ - SSS                                     | BSL, 6w, 12w               | no difference                           | Some concerns |
|                             |                            |                |                                                  |                                                                 | Efficacy | Function                       | BCTQ - FSS                                     | BSL, 6w, 12w               | no difference                           | Some concerns |
|                             |                            |                |                                                  |                                                                 | Efficacy | Electrophysiological parameter | distal sensory latency (msec)                  | BSL, 6w, 12w               | no difference                           | Some concerns |
|                             |                            |                |                                                  |                                                                 | Efficacy | Electrophysiological parameter | distal motor latency (msec)                    | BSL, 6w, 12w               | no difference                           | Some concerns |
|                             |                            |                |                                                  |                                                                 | Efficacy | Electrophysiological parameter | Sensory nerve action potential amplitude (mV)  | BSL, 6w, 12w               | no difference                           | Some concerns |
|                             |                            |                |                                                  |                                                                 | Efficacy | Electrophysiological parameter | Compound motor action potential amplitude (mV) | BSL, 6w, 12w               | no difference                           | Some concerns |
|                             |                            |                |                                                  |                                                                 | Efficacy | Electrophysiological parameter | Cross-sectional area (mm <sup>2</sup> )        | BSL, 6w, 12w               | no difference                           | Some concerns |
| Hsu et al., 2018            | Retrospective cohort study | CTS            | Intra-/Extraepineurium – carpal tunnel           | US guided hydrodissection, injection (lidocaine, triamcinolone) | Safety   | Adverse events                 | Complications <sup>18</sup> (n°)               | Post-procedure             | no difference                           | Serious       |
|                             |                            |                |                                                  |                                                                 | Safety   | Symptom severity               | BCTQ - SSS                                     | BSL, 2w <sup>19</sup>      | no difference                           | Serious       |
|                             |                            |                |                                                  |                                                                 | Safety   | Symptom severity               | Decrease of SSS scores                         | BSL, 2w <sup>19</sup>      | 2w: better for intraepineurium approach | Serious       |
|                             |                            |                |                                                  |                                                                 | Efficacy | Anatomical differences         | Cross section area (mm <sup>2</sup> )          | BSL, 2w <sup>19</sup>      | 2w: better for intraepineurium approach | Serious       |

|                       |     |     |                                                          |                                      |          |                                |                                                               |                               |                                                      |              |
|-----------------------|-----|-----|----------------------------------------------------------|--------------------------------------|----------|--------------------------------|---------------------------------------------------------------|-------------------------------|------------------------------------------------------|--------------|
|                       |     |     |                                                          |                                      | Efficacy | Anatomical differences         | Cross-sectional area reduction (mm <sup>2</sup> )             | BSL, 2w <sup>19</sup>         | 2w: better for intraepineurium approach              | Serious      |
|                       |     |     |                                                          |                                      | Efficacy | Patient satisfaction           | Patient satisfaction – semi quantitative scale                | after treatment <sup>20</sup> | no difference                                        | Serious      |
|                       |     |     |                                                          |                                      | Efficacy | Patient satisfaction           | Patient satisfaction score ≥3 (n°)                            | after treatment <sup>20</sup> | no difference                                        | Serious      |
|                       |     |     |                                                          |                                      | Efficacy | Patient satisfaction           | Patient satisfaction score ≥5 (n°)                            | after treatment <sup>20</sup> | After treatment: better for intraepineurium approach | Serious      |
|                       |     |     |                                                          |                                      | Efficacy | Function                       | BCTQ – FSS                                                    | 2w <sup>19</sup>              | no difference                                        | Serious      |
|                       |     |     |                                                          |                                      | Efficacy | Function                       | Decrease of FSS scores                                        | BSL, 2w <sup>19</sup>         | 2w: better for intraepineurium approach              | Serious      |
| Rayegani et al., 2019 | RCT | CTS | US ulnar in plane or US midline in plane - Carpal Tunnel | injection (triamcinolone, lidocaine) | Safety   | Pain                           | Improvement in Patient Pain VAS from BSL (cm)                 | BSL, 10w                      | no difference                                        | some concern |
|                       |     |     |                                                          |                                      | Safety   | Pain                           | Pain free grip strength per kg using a dynamometer            | BSL, 10w                      | no difference                                        | some concern |
|                       |     |     |                                                          |                                      | Safety   | Symptom Severity               | Improvement in BCTQ - SSS                                     | BSL, 10w                      | no difference                                        | some concern |
|                       |     |     |                                                          |                                      | Efficacy | Function                       | Improvement in BCTQ - FSS                                     | BSL, 10w                      | no difference                                        | some concern |
|                       |     |     |                                                          |                                      | Efficacy | Anatomical differences         | cross sectional area median nerve (mm <sup>2</sup> )          | BSL, 10w                      | no difference                                        | some concern |
|                       |     |     |                                                          |                                      | Efficacy | Electrophysiological parameter | improvement in sensory nerve action potential latency (ms)    | BSL, 10w                      | no difference                                        | some concern |
|                       |     |     |                                                          |                                      | Efficacy | Electrophysiological parameter | improvement in sensory nerve action potential amplitude (uV)  | BSL, 10w                      | no difference                                        | some concern |
|                       |     |     |                                                          |                                      | Efficacy | Electrophysiological parameter | improvement in compound motor action potential latency (ms)   | BSL, 10w                      | no difference                                        | some concern |
|                       |     |     |                                                          |                                      | Efficacy | Electrophysiological parameter | improvement in compound motor action potential amplitude (mV) | BSL, 10w                      | no difference                                        | some concern |
|                       |     |     |                                                          |                                      | Efficacy | Electrophysiological parameter | improvement in nerve conduction velocity (m/s)                | BSL, 10w                      | no difference                                        | some concern |

|                             |     |     |                                                |                           |          |                                |                                                      |                  |                                     |              |
|-----------------------------|-----|-----|------------------------------------------------|---------------------------|----------|--------------------------------|------------------------------------------------------|------------------|-------------------------------------|--------------|
| Babaei-Ghazani et al., 2020 | RCT | CTS | US radial or US ulnar approach - Carpal Tunnel | injection (triamcinolone) | Safety   | Pain                           | Patient Pain VAS (cm)                                | BSL, 2w, 6w, 12w | 12w: better for radial approach     | some concern |
|                             |     |     |                                                |                           | Efficacy | Symptom Severity               | BCTQ - SSS                                           | BSL, 2w, 6w, 12w | no difference                       | some concern |
|                             |     |     |                                                |                           | Efficacy | Function                       | BCTQ - FSS                                           | BSL, 2w, 6w, 12w | 6,12w: better for radial approach   | some concern |
|                             |     |     |                                                |                           | Efficacy | Electrophysiological parameter | sensory nerve action potential latency (ms)          | BSL, 2w, 6w, 12w | 12w: better for ulnar approach      | some concern |
|                             |     |     |                                                |                           | Efficacy | Electrophysiological parameter | sensory nerve action potential amplitude ( $\mu$ V)  | BSL, 2w, 6w, 12w | 12w: better for radial approach     | some concern |
|                             |     |     |                                                |                           | Efficacy | Electrophysiological parameter | compound motor action potential latency (ms)         | BSL, 2w, 6w, 12w | no difference                       | some concern |
|                             |     |     |                                                |                           | Efficacy | Electrophysiological parameter | compound motor action potential amplitude (mV)       | BSL, 2w, 6w, 12w | no difference                       | some concern |
|                             |     |     |                                                |                           | Efficacy | Anatomical differences         | median nerve circumference (cm)                      | BSL, 2w, 6w, 12w | 2,6w: better for radial approach    | some concern |
|                             |     |     |                                                |                           | Efficacy | Anatomical differences         | cross sectional area median nerve (mm <sup>2</sup> ) | BSL, 2w, 6w, 12w | 2,6,12w: better for radial approach | some concern |

The abbreviation BSL (baseline) refers to the time point before the intervention happened

AC, acromioclavicular; BCTQ, boston carpal tunnel syndrome; CTS, carpal tunnel syndrome; FSS, function severity score; GH, glenohumeral joint; IA, intraarticular; IA+SA, intraarticular and subacromial; m, month(s) OA, osteoarthritis; RCT, randomized controlled trial; ROM, range of motion; SA, subacromial; SASD, subacromial – subdeltoid bursa; SIJ, sacroiliac joint; SSS, Symptom severity score; US, ultrasound; VAS, visual analogue scale; w, week(s) y, year(s)

<sup>1</sup> The outcomes "Complications" are usually only presented in descriptive manner by the respective authors. Statistical tests were not performed by the authors, unless stated otherwise.

<sup>2</sup> No difference = at none of the give time points a difference was found between the groups. If differences were found, the time point for the differences is depicted.

<sup>3</sup> For details on RoB see supplementary table 3

<sup>4</sup> ROM of internal rotation was better in the SASD group after the procedure; however, ROM was already significantly better in the SASD group before the intervention.

<sup>5</sup> Intramuscular injections into the subscapularis and the scapulothoracic bursa were performed three times with a 1-week interval between injections.

<sup>6</sup> No serious complications such as pneumothorax or infection, or symptoms attributable to the side effects of steroid were encountered.

<sup>7</sup> Index test = microbiology culture at respective site (any germ makes a pos. results), reference standard = pathohistological diagnosis at the respective site, divided by total number of biopsy specimen (if multiple) and multiplied by 100 to yield a percentage (0-100%)

<sup>8</sup> index test is microbiology culture at respective site, reference standard is pathohistological diagnosis at the respective site - Each biopsy pair (culture, histo) should always be taken from the same spot (0-100%)

- 
- <sup>9</sup> The needle touched the patella cartilage or periosteum (no other complications happened)
- <sup>10</sup> No major complications, such as infection or fat atrophy
- <sup>11</sup> None of the patients had joint infection or systemic side effects after injection.
- <sup>12</sup> Not described by the authors
- <sup>13</sup> Possible complications included hematoma, increased pain, reddening in the puncture area
- <sup>14</sup> In case patients had pain/finger snapping/PIP contracture at BSL, they were assessed for remission of pain after 4 weeks
- <sup>15</sup> Such as tendon rupture or skin atrophy – none of them happened
- <sup>16</sup> In the longitudinal plane
- <sup>17</sup> No complications such as vessel insult or median nerve injury
- <sup>18</sup> Complications such as Median nerve injury, permanent median nerve damage, hematoma, scar, abscess
- <sup>19</sup> After a mean 2 weeks after the intervention
- <sup>20</sup> Exact time point not reported

## References

- ALTHOFF, C. E., BOLLOW, M., FEIST, E., MARTICORENA-GARCIA, S. R., ESHED, I., DIEKHOFF, T., HAMM, B. & HERMANN, K. G. 2015. CT-guided corticosteroid injection of the sacroiliac joints: quality assurance and standardized prospective evaluation of long-term effectiveness over six months. *Clinical Rheumatology*, 34, 1079-84.
- BABAEI-GHAZANI, A., FOROGH, B., RAISSI, G. R., AHADI, T., EFTEKHARSADAT, B., YOUSEFI, N., RAHIMI-DEHGOLAN, S. & MORADI, K. 2020. Ultrasound-Guided Corticosteroid Injection in Carpal Tunnel Syndrome: Comparison Between Radial and Ulnar Approaches. *Journal of pain research*, 13, 1569-1578.
- BABAEI-GHAZANI, A., NIKBAKHT, N., FOROGH, B., RAISSI, G. R., AHADI, T., EBADI, S., ROOMIZADEH, P., FADAVI, H. R., RAEISSADAT, S. A. & EFTEKHARSADAT, B. 2018. Comparison Between Effectiveness of Ultrasound-Guided Corticosteroid Injection Above Versus Below the Median Nerve in Mild to Moderate Carpal Tunnel Syndrome: A Randomized Controlled Trial. *American Journal of Physical Medicine & Rehabilitation*, 97, 407-413.
- CHANG, C. Y., SIMEONE, F. J., NELSON, S. B., TANEJA, A. K. & HUANG, A. J. 2015. Is Biopsying the Paravertebral Soft Tissue as Effective as Biopsying the Disk or Vertebral Endplate? 10-Year Retrospective Review of CT-Guided Biopsy of Diskitis-Osteomyelitis. *AJR Am J Roentgenol*, 205, 123-9.
- CHANG, W. H., KIM, Y. W., CHOI, S. & LEE, S. C. 2014. Comparison of the therapeutic effects of intramuscular subscapularis and scapulothoracic bursa injections in patients with scapular pain: A randomized controlled trial. *Rheumatology International*, 34, 1203-1209.
- CHO, C. H., KIM DU, H., BAE, K. C., LEE, D. & KIM, K. 2016. Proper site of corticosteroid injection for the treatment of idiopathic frozen shoulder: Results from a randomized trial. *Joint Bone Spine*, 83, 324-9.
- HARTUNG, W., ROSS, C. J., STRAUB, R., FEUERBACH, S., SCHOLMERICH, J., FLECK, M. & HEROLD, T. 2010. Ultrasound-guided sacroiliac joint injection in patients with established sacroiliitis: precise IA injection verified by MRI scanning does not predict clinical outcome. *Rheumatology (Oxford)*, 49, 1479-82.
- HSU, Y. C., YANG, F. C., HSU, H. H. & HUANG, G. S. 2018. Ultrasound-Guided Corticosteroid Injection in Patients with Carpal Tunnel Syndrome: Efficacy of Intra-Epineurial Injection. *Ultraschall Med*, 39, 334-342.
- JANG, S. H., LEE, S. C., LEE, J. H., NAM, S. H., CHO, K. R. & PARK, Y. 2013. Comparison of ultrasound (US)-guided intra-articular injections by in-plain and out-of-plain on medial portal of the knee. *Rheumatology International*, 33, 1951-9.
- KHALLAF, S. F., HUSSEIN, M. I., EL-BARBARY, A. M. & EL KHOULY, R. M. 2018. Efficacy of ultrasonography-guided intra-articular steroid injection of the shoulder and exercising in patients with adhesive capsulitis: Glenohumeral versus subacromial approaches. *Egyptian Rheumatologist*, 40, 277-280.
- MARDANI-KIVI, M., KARIMI-MOBARAKEH, M., BABAEI JANDAGHI, A., KEYHANI, S., SAHEB-EKHTIARI, K. & HASHEMI-MOTLAGH, K. 2018. Intra-sheath versus extra-sheath ultrasound guided corticosteroid injection for trigger finger: a triple blinded randomized clinical trial. *Phys Sportsmed*, 46, 93-97.
- PARK, K. D., AHN, J. K., LEE, S. C., LEE, J., KIM, J. & PARK, Y. 2013. Comparison of ultrasound-guided intra-articular injections by long axis in plane approach on three different sites of the knee. *American Journal of Physical Medicine & Rehabilitation*, 92, 990-8.
- PARK, Y., LEE, S. C., NAM, H. S., LEE, J. & NAM, S. H. 2011. Comparison of sonographically guided intra-articular injections at 3 different sites of the knee. *Journal of Ultrasound in Medicine*, 30, 1669-76.
- RAYEGANI, S. M., RAEISSADAT, S. A., AHMADI-DASTGERDI, M., BAVAGHAR, N. & RAHIMI-DEHGOLAN, S. 2019. Comparing The Efficacy Of Local Triamcinolone Injection In Carpal Tunnel Syndrome Using Three Different Approaches with or without Ultrasound Guidance. *Journal of pain research*, 12, 2951-2958.
- SABETI-ASCHRAF, M., STOTTER, C., THALER, C., KRISTEN, K., SCHMIDT, M., KRIFTER, R. M., HEXEL, M., OSTERMANN, R., HOFSTAEDTER, T., GRAF, A. & WINDHAGER, R. 2013. Intra-articular versus periarticular acromioclavicular joint injection: a multicenter, prospective, randomized, controlled trial. *Arthroscopy*, 29, 1903-10.
- SHINOMIYA, R., SUNAGAWA, T., NAKASHIMA, Y., YOSHIZUKA, M. & ADACHI, N. 2016. Impact of Corticosteroid Injection Site on the Treatment Success Rate of Trigger Finger: A Prospective Study Comparing Ultrasound-Guided True Intra-Sheath and True Extra-Sheath Injections. *Ultrasound Med Biol*, 42, 2203-8.
