# Supplementary figures and images for: Value of imaging to guide interventional procedures in rheumatic and musculoskeletal diseases: a systematic literature review informing EULAR points to consider
Source: HighWire-hosted journal article supplement (doi:10.1136/rmdopen-2021-001864), 2021-11-01

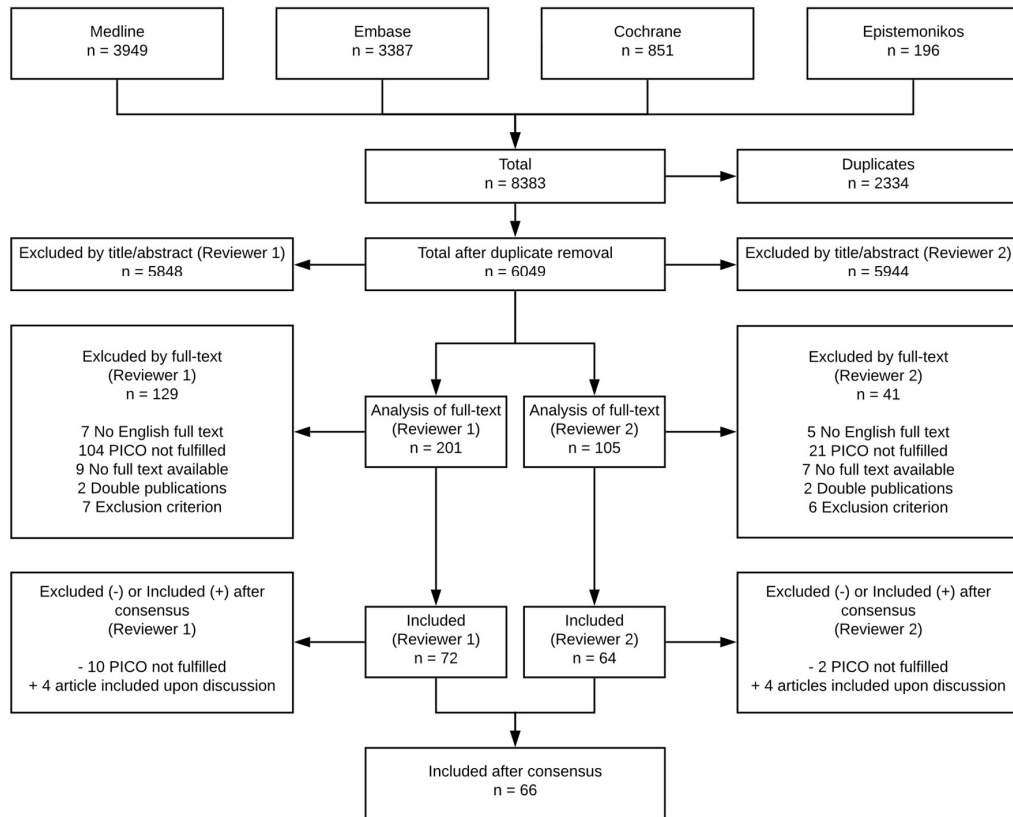

### Supplementary figure 1

Flowchart for the systematic literature review

Supplement: rmdopen-2021-001864supp003_data_supplement.pdf [file rmdopen-2021-001864supp003_data_supplement.pdf]
